# Neural Sources Underlying Visual Word Form Processing as Revealed by Steady State Visual Evoked Potentials (SSVEP)

Fang Wang<sup>1</sup>, Blair Kaneshiro<sup>1</sup>, C. Benjamin Strauber<sup>1</sup>, Lindsey Hasak<sup>1</sup>,  
Quynh Trang H. Nguyen<sup>1</sup>, Alexandra Yakovleva<sup>2,3</sup>, Vladimir Y. Vildavski<sup>2,3</sup>,  
Anthony M. Norcia<sup>2,3</sup>, and Bruce D. McCandliss<sup>\*1,2</sup>

<sup>1</sup>*Graduate School of Education, Stanford University, Stanford, CA, USA*

<sup>2</sup>*Department of Psychology, Stanford University, Stanford, CA, USA*

<sup>3</sup>*Wu Tsai Neurosciences Institute, Stanford, CA, USA*

April 16, 2021

---

\*Corresponding author: Bruce McCandliss, [brucemc@stanford.edu](mailto:brucemc@stanford.edu). Graduate School of Education, 485 Lasuen Mall, Stanford, CA 94305 USA

## Abstract

EEG has been central to investigations of the time course of various neural functions underpinning visual word recognition. Recently the steady-state visual evoked potential (SSVEP) paradigm has been increasingly adopted for word recognition studies due to its high signal-to-noise ratio. Such studies, however, have been typically framed around a single source in the left ventral occipitotemporal cortex (vOT). Here, we combine SSVEP recorded from 16 adult native English speakers with a data-driven spatial filtering approach—Reliable Components Analysis (RCA)—to elucidate distinct functional sources with overlapping yet separable time courses and topographies that emerge when contrasting words with pseudofont visual controls. The first component topography was maximal over left vOT regions with an early latency (approximately 180 msec). A second component was maximal over more dorsal parietal regions with a longer latency (approximately 260 msec). Both components consistently emerged across a range of parameter manipulations including changes in the spatial overlap between successive stimuli, and changes in both base and deviation frequency. We then contrasted word-in-nonword and word-in-pseudoword to test the hierarchical processing mechanisms underlying visual word recognition. Results suggest that these hierarchical contrasts fail to evoke a unitary component that might be reasonably associated with lexical access.

**Keywords** EEG SSVEP RCA spatial filtering visual word form processing vOT feedforward and feedback connections

**Declarations of interest** None

# 1 Introduction

Reading is a remarkable aspect of human cognitive development and is essential in everyday life. Through frequent exposure to printed words, visual specialization for letter strings is developed (Maurer et al., 2006), and skilled readers can read around 250 words per minute (Rayner, 1998). Such high reading speed requires fast visual word recognition that is dependent on specialized visual processes and brain sources.

Functional magnetic resonance imaging (fMRI) studies have reliably localized an area of the left lateral ventral occipitotemporal cortex (vOT) that is particularly selective to printed words relative to other visual stimuli such as line drawings (Centanni et al., 2017) and faces (Baker et al., 2007; Dehaene et al., 2005; Dehaene & Cohen, 2011). The sensitivity of the left vOT site to visual words is reproducible across different languages and fonts (Krafnick et al., 2016) and individuals (Dehaene et al., 2010; McCandliss et al., 2003), and is invariant to font, size, case, and even retinal location (Dehaene et al., 2001, 2004).

Numerous fMRI studies have proposed that the vOT follows a hierarchical posterior-to-anterior progression, with posterior regions being more selective to visual word form processing while anterior parts are more weighted to high-level word features (Dehaene et al., 2005; Vinckier et al., 2007). The posterior-to-anterior gradient is accomplished by increasing neuron receptive fields from posterior occipital to anterior temporal regions, and as a result, the sensitivity of neurons hierarchically increases from letter fragments to individual letters, bigrams, trigrams, morphemes, and finally entire word forms (Dehaene et al., 2005). A recent study by Lerma-Usabiaga et al. (2018) suggested that, in addition to sub-regions within the vOT, other regions of the language network (e.g., angular gyrus) are also involved in the rapid identification of word forms by transferring and integrating information from and towards the vOT. Lerma-Usabiaga et al. (2018) further suggested that the posterior area of vOT is structurally connected to the intraparietal sulcus mostly through a bottom-up path-

---

Abbreviations: Reliable Components Analysis (RCA); Reliable Component 1 (RC1); Reliable Component 2 (RC2); steady-state visual evoked potential (SSVEP).

26 way while the middle/anterior area is connected to other language areas most likely through  
27 both feed-forward and -backward connections (see also Price & Devlin (2011)).

28 In contrast to fMRI with its high spatial resolution, electroencephalography (EEG) can  
29 detect text-related brain electrical activity with high temporal resolution. Event-related  
30 potentials (ERP) studies have characterized a component that peaks between 150 to 200 ms  
31 with an occipito-temporally negative and fronto-centrally positive topography, termed N1 (or  
32 N170). This N1 component is typically larger for word and word-like stimuli than for visually  
33 controlled symbols (Brem et al., 2006; Maurer et al., 2005, 2006). During development, N1  
34 sensitivity to printed words emerges when children learn print-speech sound correspondences,  
35 especially in alphabetic languages (Brem et al., 2010) within the first two years of school  
36 reading education (Maurer et al., 2005).

37 More recently, Steady-State Visual Evoked Potential (SSVEP) paradigm have also been  
38 used to investigate visual word recognition due to its high signal-to-noise (SNR) ratio. In  
39 contrast to typical ERP approaches demanding long inter-stimulus intervals, the SSVEP  
40 paradigm presents a sequence of stimuli at a fast periodic rate (e.g., 10 Hz, 100 ms per  
41 item). The presentation of temporally periodic stimuli elicits periodic responses at the  
42 predefined stimulation frequency and its harmonics (i.e., integer multiples of the stimulus  
43 frequency). Those periodic responses are referred to as SSVEP because they are stable in  
44 amplitude and phase over time (Regan, 1966, 1989). Importantly, the SSVEP paradigm  
45 can provide high SNR ratio in only a few minutes of stimulation due to its small noise  
46 bandwidth. However, the SSVEP paradigm has long been limited to the field of low-level  
47 visual perception and attention (for a review, see Norcia et al. 2015). Only recently, this  
48 paradigm has been extended to more complex visual stimuli processing, such as objects  
49 (Stothart et al., 2017), faces (Alonso-Prieto et al., 2013; Farzin et al., 2012; Liu-Shuang et al.,  
50 2014), numerical quantities (Guillaume et al., 2018; Van Rinsveld et al., 2020), text (Yeatman  
51 & Norcia, 2016), letters (Barzegaran & Norcia, 2020), and words (Lochy et al., 2015, 2016,  
52 2018, 2020). These SSVEP studies of higher-level processes have used different presentation

53 paradigms including adaptation and “base/deviant” approaches. The adaptation approach  
54 has been used to examine whether stimulus presentation locations affect perception, mainly  
55 in relation to holistic processing of faces, by comparing upright or inverted faces with either  
56 the same or different identity (Rossion et al., 2012). In the “base/deviant” stimulation  
57 mode, a sequence of “base” stimuli are presented at a periodic rate (e.g., 6 Hz) with every  
58 other image being either an intact image that differs from the base in a particular aspect  
59 or a scrambled one (Farzin et al., 2012; Yeatman & Norcia, 2016). For example, a base of  
60 6 Hz alternates with a 3 Hz “deviant” ( $6/2=3$  Hz), which is also called “image alternation”  
61 mode. Alternatively, the base stimuli are regularly interspersed with deviant stimuli at a  
62 sub-multiple of the base rate that is greater than two (Liu-Shuang et al., 2014; Lochy et  
63 al., 2015, 2016, 2018)—for example, a base of 10 Hz with every 5th image (instead of every  
64 other image) being a deviant, i.e., deviant frequency is 2 Hz (base frequency 10 Hz divided  
65 by 5). However, to our knowledge, no study has directly compared the “image alternation”  
66 mode and the mode wherein deviant stimuli are presented at a sub-multiple greater than  
67 twice the base rate. Therefore, the current study compared these two modes to determine  
68 which of these two modes elicits responses with a higher signal-to-noise ratio. Findings from  
69 this research would provide an important consideration relevant to designing future studies  
70 of early readers.

71 Of present interest, two SSVEP studies on text and letter recognition have revealed multi-  
72 ple underlying sources with different temporal dynamics and scalp topography (Barzegaran  
73 & Norcia, 2020; Yeatman & Norcia, 2016) either by defining different regions of interest  
74 (Yeatman & Norcia, 2016) or employing a spatial filtering approach (Barzegaran & Norcia,  
75 2020). Other SSVEP work has focused on only a single source of word-related processing  
76 in the left hemisphere (Lochy et al., 2015, 2016, 2018) by analyzing periodic responses from  
77 several pre-selected (literature-based) sensors. In contrast to data analyses of several pre-  
78 selected sensors that reduced the whole map of evoked data to a restricted and typically  
79 biased subset (Kilner, 2013), spatial filtering approaches offer a purely data-driven alterna-

80 tive for selecting sensors. These methods compute weighted linear combinations across the  
81 full montage of sensors to capture and isolate different neural processes arising from different  
82 underlying cortical sources (M. X. Cohen, 2017). A number of linear spatial filters, such as  
83 Principal Components Analysis (PCA) and Common Spatial Patterns (CSP) (Blankertz et  
84 al., 2008), have been applied to SSVEP data, mainly in the brain-computer interface (BCI)  
85 field (e.g., Mohanchandra et al. 2014). In cognitive neuroscience, a spatial filtering technique  
86 referred to as Reliable Components Analysis (RCA) has been increasingly used (Barzegaran  
87 & Norcia, 2020; Dmochowski et al., 2012, 2015). RCA derives a set of spatial components  
88 (i.e., spatial filters operationalized as topographic weights) that maximize across-trial or  
89 across-subject correlations (“reliability”) while minimizing noise (“variance”). Specifically,  
90 RCA first discovers the optimal spatial filter weighting of the signal, then projects the data  
91 through this spatial filter to enable investigation of phase-locked topographic activities and  
92 to capture each temporal/topographical source of reliable signal across events and subjects  
93 (detailed information described in Dmochowski et al. 2012, 2015).

94 Moreover, in conjunction with a recently developed RCA approach, Norcia et al. (2020)  
95 for the first time estimated the latency of the SSVEP Norcia et al. (2020). This was done  
96 by fitting a line through the phases at harmonics with significant responses; the slope of the  
97 line is interpreted as the response latency. Latency estimation of component(s) can provide  
98 insight into temporal dynamics of different processes located at different sources, extending  
99 on the majority of previous SSVEP studies, which have only focused on topographies and  
100 amplitudes (Lochy et al., 2015, 2016, 2018).

101 Employing the spatial filtering component analysis (RCA) approach used in Barzegaran  
102 & Norcia (2020) and Norcia et al. (2020), here we reproduced and extended a previous  
103 SSVEP study of French word processing (Lochy et al., 2015), with 4-letter English word  
104 versus pseudofont comparisons. Our goal was to determine whether multiple sources could  
105 be revealed in conditions where only a single source of activity was described. Should this  
106 prove to be the case, we were further interested in whether these potential sources could be

107 consistently detected at different stimulus presentation rates and retinal locations.

108 Specifically, the current study addresses these questions by presenting familiar words  
109 interspersed periodically among control stimuli (i.e., pseudofonts) in three different styles:  
110 (1) pseudofont base at a presentation frequency of 10 Hz and word deviant at 2 Hz; (2)  
111 same presentation rates as in (1) but with stimulus presentation locations jittered around  
112 the center of the screen; and (3) pseudofont base at a presentation frequency of 6 Hz and  
113 word deviant at 3 Hz. To investigate the hierarchy of visual word recognition, we included  
114 two additional stimulus contrasts: word deviant in nonword base, and word deviant in  
115 pseudoword base.

116 Based on the evidence from Lerma-Usabiaga et al. (2018) and Barzegaran & Norcia  
117 (2020), we hypothesized that word deviants among pseudofont base stimuli would elicit  
118 more than one neural discrimination source when subjected to RCA, producing at least two  
119 reliable signal sources with distinct temporal and topographical information. We sought to  
120 further investigate whether RCA component topographies and time-courses were specific to  
121 particular experimental parameters or whether similar components could be elicited across  
122 a wider range of presentation rates and changes in stimulus locations.

123 Finally, we wished to test a central assumption in previous reports (e.g., Lochy et al.  
124 (2015)) based on the notion that hierarchical aspects of visual word processing can be clearly  
125 isolated based on progressively specific contrasts of word-in-pseudofont, word-in-nonword,  
126 and word-in-pseudoword. Here, RCA provides a novel opportunity to first investigate distinct  
127 component topographies elicited from word-in-pseudofont contrasts, and then to investigate  
128 the hypothesis that word-in-nonword and word-in-pseudoword contrasts successfully isolate  
129 a subset of these sources.

## 130 2 Methods

### 131 2.1 Ethics Statement

132 This research was approved by the Institutional Review Board of Stanford University. All  
133 participants delivered written informed consent prior to the study after the experimental  
134 protocol was explained.

### 135 2.2 Participants

136 Data from 16 right-handed, native English speakers (between 18.1 and 54.9 years old, median  
137 age 20.7 years, 7 males) were analyzed in this study. All participants had normal or corrected-  
138 to-normal vision and had no reading disabilities. Data from 5 additional non-native English  
139 speakers were recorded, but not analyzed here. After the study, each participant received  
140 cash compensation.

### 141 2.3 Stimuli

142 The study involved four types of stimuli—words (W), pseudofonts (PF), nonwords (NW),  
143 and pseudowords (PW)—all comprising 4 elements (letters or pseudoletters). The English  
144 words were rendered in the Courier New font. Pseudofont letter strings were rendered from  
145 the Brussels Artificial Character Set font (BACS-2, Vidal & Chetail (2017)), mapping be-  
146 tween pseudofont glyphs and Courier New word glyphs. Nonwords and pseudowords were  
147 also built on an item-by-item basis by reordering the letters of the words: nonwords were un-  
148 pronounceable, statistically implausible letter string combinations, while pseudowords were  
149 pronounceable and well-matched for orthographic properties of intact words (Keuleers &  
150 Brysbaert, 2010). Bigram frequencies were matched between words ( $M(\pm SD) = 13664 (\pm$   
151  $11007)$ ), pseudowords ( $M(\pm SD) = 15177 (\pm 8549)$ ) and nonwords ( $M(\pm SD) = 12775 (\pm$   
152  $6065)$ ) ( $F(2, 87) < 1, p = 0.57$ ). Stimulus parameters are summarized in Table 1, and exam-  
153 ple stimuli are shown in Figure 1. All words were common monosyllabic singular nouns. The



154 initial and final letters in all words, pseudowords, and nonwords were consonants. Words  
155 were chosen to be frequent (average 97.7 per million) with limited orthographic neighbors  
156 (average 2.3, range from 0 to 4) according to the Children’s Printed Word Database (Mas-  
157 terson et al., 2010). Words were also chosen with attention to feedforward consistency. All  
158 words were fully feedforward consistent based on rime according to the database provided  
159 by Ziegler et al. (1997). When averaging across consistency values for each word’s onset,  
160 nucleus, and coda in the database provided by Chee et al. (2020), words had an average  
161 token feedforward consistency of 0.79. All in all, there were 30 exemplars of each type of  
162 stimulus, for 120 exemplars total. All images were  $600 \times 160$  pixels in size, spanning 7.5  
163 (horizontal) by 2 (vertical) degrees of visual angle.

164 We investigated five experimental conditions. Conditions 1, 2, and 3 involved word  
165 deviants embedded in a stream of pseudofont base. For conditions 1 and 2, word deviants  
166 were presented at a rate of 2 Hz and were embedded in a 10-Hz stream of pseudofonts.  
167 In order to explore the influence of presentation location on word processing, condition 1  
168 stimuli were presented in the center of the screen, while in condition 2, stimulus positions  
169 were spatially jittered around the center of the monitor (8 pixels range, visual angle of  
170 0.1 degrees). Moreover, to directly compare the effect of different base/deviant ratios, in  
171 condition 3 we used a deviant frequency of 3 Hz (based on the study of Yeatman & Norcia  
172 (2016)) and a base frequency of 6 Hz; this involved the same word-in-pseudofont contrast  
173 as condition 1, and was presented at the center of the monitor. Finally, conditions 4 and 5  
174 presented word-in-nonword and word-in-pseudoword contrasts, respectively (see also Lochy  
175 et al. (2015)). Like condition 1, word deviants were presented at the center of the monitor  
176 at 2 Hz, in a base stream of 10 Hz.

## 177 **2.4 Experimental Procedure**

178 Participants were seated in a darkened room 1 m away from the computer monitor. Prior  
179 to the experiment, a brief practice session was held to familiarize the participant with the

|                       | Condition 1  | Condition 2  | Condition 3 | Condition 4  | Condition 5  |
|-----------------------|--------------|--------------|-------------|--------------|--------------|
| <b>Stimuli</b>        | W in PF      | W in PF      | W in PF     | W in NW      | W in PW      |
| <b>Deviant / Base</b> | 2 Hz / 10 Hz | 2 Hz / 10 Hz | 3 Hz / 6 Hz | 2 Hz / 10 Hz | 2 Hz / 10 Hz |
| <b>Position</b>       | Centered     | Jittered     | Centered    | Centered     | Centered     |

Table 1: **Stimulus conditions.** Five stimulus conditions were used to probe different types of processing during word recognition. Conditions 1–3 assessed processing of words (W) relative to pseudofonts (PF), while conditions 4 and 5 assessed processing of words relative to nonwords (NW) and pseudowords (PW), respectively. Word-in-pseudofont contrasts were presented with 2-Hz deviant and 10-Hz base, either centered (condition 1) or jittered (condition 2) around the center of the monitor. The centered word-in-pseudofont contrast was also presented with 3-Hz deviant and 6-Hz base (condition 3). Word-in-nonword (condition 4) and word-in-pseudoword (condition 5) contrasts were presented centered on the screen with frequency rates of 2-Hz deviant and 10-Hz base.

180 experimental procedure.

181 Each stimulation sequence started with a blank screen, the duration of which was jittered  
182 between 2500 ms and 3500 ms. Then, W deviant stimuli embedded in the stream of base  
183 stimuli (PF, NW, or PW) were presented at a rate of 2 Hz (i.e., every 500 ms), with a base  
184 rate of 10 Hz (i.e, every 100 ms) in conditions 1, 2, 4, and 5; in condition 3, W deviant  
185 were presented at a frequency of 3 Hz (i.e, every 333 ms) with a base rate of 6 Hz (i.e, every  
186 167 ms), during which deviant and base alternated with each other. Thus, a W deviant  
187 stimulus was presented every 5 item presentations in conditions 1, 2, 4, and 5, and every 2  
188 items in condition 3. Each condition comprised four trials (each trial lasted for 12 seconds),  
189 and was repeated four times, resulting in 16 trials per condition, and 80 trials total in all  
190 conditions. 20 trials (5 conditions  $\times$  4 trials of each) comprised a block, and the order of  
191 trials in each block and all 4 blocks were randomized.

192 In order to maintain participants’ attention throughout the experiment, a fixation color  
193 change task was used. During the recording, the participant continuously fixated on a  
194 central cross, which was superimposed over the stimuli of interest and pressed a button  
195 whenever they detected that the color of the fixation cross changed from blue to red (2  
196 changes randomly timed per sequence/trial). The color change task was on a “staircase”  
197 mode, during which the time of color change flashes became faster as the accuracy increased,

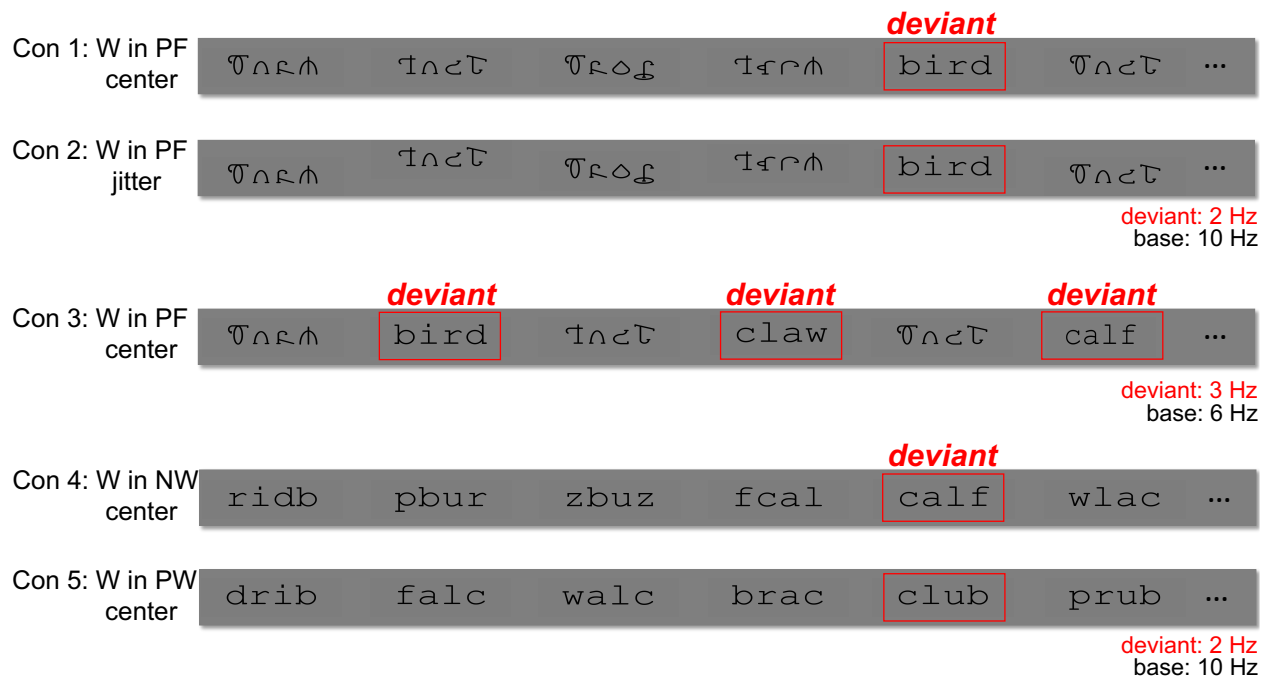

Figure 1: **Examples of stimuli presented in the experiment.** 2-Hz word deviants were embedded in a 10-Hz stream of pseudofont (W in PF) in conditions 1 and 2. Condition 2 used the same word and pseudofont stimuli as Condition 1, but spatially jittered their location on the monitor. Condition 3 presented the same stimuli used in Condition 1 but with 3-Hz deviant and 6-Hz base frequencies. 2-Hz word deviants were embedded in a 10-Hz stream of nonword (W in NW) and pseudoword (W in PW) base, respectively, in conditions 4 and 5.

198 or became slower when the accuracy decreased. The whole experiment took around 30  
 199 minutes per participant, including breaks between blocks.

## 200 2.5 EEG Recording and Preprocessing

201 The 128-sensor EEG were collected with the Electrical Geodesics, Inc. (EGI) system (Tucker,  
 202 1993), using a Net Amps 300 amplifier and geodesic sensor net. Data were acquired against  
 203 Cz reference, at a sampling rate of 500 Hz. Impedances were kept below 50 k $\Omega$ . Stimuli  
 204 were presented using in-house stimulus presentation software. Each recording was bandpass  
 205 filtered offline (zero-phase filter, 0.3–50 Hz) using Net Station Waveform Tools. The data  
 206 were then imported into in-house signal processing software for preprocessing. EEG data  
 207 were re-sampled to 420 Hz to ensure an integer number of time samples per video frame

208 at a frame rate of 60 Hz, as well as an integer number of frames per cycle for the present  
209 stimulation frequencies. EEG sensors with more than 15% of samples exceeding a 30  $\mu\text{V}$   
210 amplitude threshold were replaced by an averaged value from six neighboring sensors. The  
211 continuous EEG was then re-referenced to average reference (Lehmann & Skrandies, 1980)  
212 and segmented into 1-second epochs. Epochs with more than 10% of time samples exceeding  
213 a 30  $\mu\text{V}$  noise threshold, or with any time sample exceeding an artifact threshold of (60  $\mu\text{V}$ )  
214 (e.g., eye blinks, eye movements, or body movements), were excluded from further analyses on  
215 a sensor-by-sensor basis. The EEG signals were filtered in the time domain using Recursive  
216 Least Squares (RLS) filters (Tang & Norcia, 1995) tuned to each of the analysis frequencies  
217 and converted to complex amplitude values by means of the Fourier transform. Given 1-  
218 second data epochs, the resulting frequency resolution was 1 Hz. Complex-valued RLS  
219 outputs were decomposed into real and imaginary coefficients for input to the spatial filtering  
220 computations, as described below.

## 221 **2.6 Analysis of Behavioral Data**

222 Behavioral responses for the fixation cross color change task served to monitor participants'  
223 attention during EEG recording. We conducted one-way ANOVAs separately for reaction  
224 time and accuracy to determine whether participants were highly engaged during the whole  
225 experiment.

## 226 **2.7 Analysis of EEG Data**

### 227 **2.7.1 Reliable Components Analysis**

228 Reliable Components Analysis (RCA) is a matrix decomposition technique that derives a  
229 set of components that maximizes trial-to-trial covariance relative to within-trial covari-  
230 ance (Dmochowski et al., 2012, 2015). Since response phases of SSVEP are constant over  
231 repeated stimulations, RCA uses this trial-to-trial reliability to decompose the entire 128-

232 sensor array into a small number of reliable components (RCs), the activations of which  
233 reflect phase-locked activities. Moreover, RCA achieves higher output SNR with a low trial  
234 count compared to other spatial filtering approaches such as PCA and CSP (Dmochowski et  
235 al., 2015).

236 Given a sensor-by-feature EEG data matrix (where features could represent e.g., time  
237 samples or spectral coefficients), RCA computes linear weightings of sensors—that is, linear  
238 spatial filters—through which the resulting projected data exhibit maximal Pearson Prod-  
239 uct Moment Correlation Coefficients (Pearson, 1896) across neural response trials. The  
240 projection of EEG data matrices through spatial filter vectors transforms the data from  
241 sensor-by-feature matrices to component-by-feature matrices, with each component repre-  
242 senting a linear combination of sensors. For the present study, EEG features are the real and  
243 imaginary Fourier coefficients at selected frequencies. As RCA is an eigenvalue decomposi-  
244 tion (Dmochowski et al., 2012), it returns multiple components, which are sorted according  
245 to “reliability” explained (i.e., the first component, RC1, explains the most reliability in the  
246 data). Forward-model projections of the eigenvectors (spatial filter vectors) can be visualized  
247 as scalp topographies (Parra et al., 2005). As eigenvectors are known to receive arbitrary  
248 signs (Bro et al., 2008), we manually adjusted the signs of the spatial filters of interest based  
249 on the maximal correlation between raw sensor data and RCA data. Quantitative com-  
250 parisons of topographies (e.g., across conditions) were made by correlating these projected  
251 weight vectors. Finally, we computed the percentage of reliability explained by individual  
252 components using the corresponding eigenvalues, as described by Dmochowski et al. (2015).

### 253 **2.7.2 RCA Calculations**

254 In order to test whether low-level features were well matched across conditions, we first  
255 computed RCA at base frequencies only. Specifically, we input as features the real and  
256 imaginary frequency coefficients of the first four harmonics of the base (i.e, 10 Hz, 20 Hz,  
257 30 Hz, 40 Hz for conditions 1, 2, 4 and 5; 6 Hz, 12 Hz, 18 Hz, 24 Hz for condition 3). RCA

258 was computed separately for each stimulus condition.

259 We next computed RCA at deviant frequencies in order to investigate the processing  
260 differences between words and control stimuli (herein pseudofonts, nonwords, and pseu-  
261 dowords). For the deviant analyses, this involved real and imaginary coefficients at the  
262 first four harmonics (2 Hz, 4 Hz, 6 Hz, and 8 Hz) in conditions 1, 2, 4, and 5. To ex-  
263 plore whether visual word processing can further be consistently detected under different  
264 presentation rates, we conducted RCA on data for condition 3. For this, we input frequency  
265 coefficients of odd harmonics of the deviant, excluding base harmonics (i.e., 3 Hz, 9 Hz,  
266 15 Hz, 21 Hz—excluding 6 Hz, 12 Hz, 18 Hz, 24 Hz).

267 To assess the possible role of local adaptation to the stimulus presentation, we also  
268 measured responses to word-in-pseudofont using spatially jittered stimuli (condition 2). In  
269 comparing RCA results of conditions 1 (word-in-pseudofont with centered presentation lo-  
270 cation) and 2 (word-in-pseudofont with jittered presentation location), we found the RC  
271 topographies of conditions 1 and 2 to be highly correlated (RC1:  $r = 0.99$ ; RC2:  $r = 0.95$ ).  
272 Therefore, we subsequently computed RCA on these two conditions together to enable direct  
273 quantitative comparison of the projected data in a shared component space.

### 274 **2.7.3 Analysis of Component-Space Data**

275 For each deviant RCA analysis, we report spatial filter topographies and statistical analysis  
276 of the projected data for the first two components returned by RCA. For each component, we  
277 analyzed component-space responses at each harmonic input to the spatial filtering calcula-  
278 tion. We first projected the sensor-space data through the spatial filter vectors for RCs 1 and  
279 2. The data were averaged across epochs on a per-participant basis, and statistical analyses  
280 were performed across the distribution of participants. The distribution of real and imag-  
281 inary coefficients together at each harmonic formed the basis of a Hotelling's two-sample  
282  $t^2$  test (Victor & Mast, 1991) to identify statistically significant responses. We corrected  
283 for multiple comparisons using False Discovery Rate (FDR; Benjamini & Yekutieli (2001))

284 across 8 comparisons (4 harmonics  $\times$  2 components per condition).

285 To test whether phase information was consistent with a single phase lag reflected sys-  
286 tematically across harmonics, we fit linear functions through the corresponding phases of  
287 successive harmonics, as such a linear relationship would implicate a fixed group delay which  
288 can be interpreted as an estimated latency in the SSVEPs (Norcia et al., 2020). At har-  
289 monics with significant responses for both RCs (condition 1, conditions 1 and 2 comparison,  
290 condition 3), we used the Circular Statistics toolbox (Berens et al., 2009) to compare distri-  
291 butions of RC1 and RC2 phases at those significant harmonics. The results were corrected  
292 using FDR across 2 comparisons (2 significant harmonics) for condition 1 and conditions 1  
293 and 2; condition 3 involved no multiple comparisons as only one harmonic was significant.  
294 For each of these harmonics, we additionally report each mean RC2-RC1 phase difference in  
295 msec.

296 For each deviant RCA analysis, we present topographic maps of the spatial filtering com-  
297 ponents, and also visualize the projected data in three ways. First, mean responses are  
298 visualized as vectors in the 2D complex plane, with amplitude information represented as  
299 vector length, phase information in the angle of the vector relative to 0 radians (counter-  
300 clockwise from the 3 o'clock direction), and standard errors of the mean as error ellipses.  
301 Second, we present bar plots of amplitudes ( $\mu V$ ) across harmonics, with significant responses  
302 (according to adjusted  $p_{FDR}$  values of  $t^2$  tests of the complex data) indicated with asterisks.  
303 Finally, we present phase values (radians) plotted as a function of harmonic; when responses  
304 are significant for at least two harmonics, this is accompanied by a line of best fit and slope  
305 (latency estimate).

306 For each base RCA analysis, we report spatial filter topographies and statistical analysis  
307 of the projected data for the first component returned by RCA. As with the deviant RCA  
308 analysis, we also corrected for multiple comparisons using FDR (Benjamini & Yekutieli, 2001)  
309 across 4 comparisons (4 harmonics  $\times$  1 component per condition). In contrast to deviant  
310 RCA analysis, we visualize the projected data only in bar plots of amplitudes ( $\mu V$ ) across

311 harmonics, with significant responses (according to adjusted  $p_{FDR}$  values) indicated with  
312 asterisks. Phase information and latency estimation are not included here because temporal  
313 dynamics are less accurate and less interpretable, especially at high-frequency harmonics  
314 (e.g., 30 Hz and 40 Hz) (Cottureau et al., 2011; Norcia et al., 2015).

## 315 **3 Results**

### 316 **3.1 Behavioral Results**

317 For the color change detection task, the mean and standard deviation (SD) of accuracy  
318 and reaction time across five conditions are summarized in Table 2. Separate one-way  
319 ANOVAs indicate that there was no significant difference across conditions in either ac-  
320 curacy ( $F(4, 70) = 0.09$ ,  $p = 0.98$ ) or reaction time ( $F(4, 70) = 0.08$ ,  $p = 0.99$ ). Thus, we  
321 concluded that participants were sufficiently engaged throughout the experiment<sup>1</sup>.

|                              | Condition 1  | Condition 2  | Condition 3  | Condition 4  | Condition 5  |
|------------------------------|--------------|--------------|--------------|--------------|--------------|
| <b>Stimuli</b>               | W in PF      | W in PF      | W in PF      | W in NW      | W in PW      |
| <b>Accuracy(%±SD)</b>        | 95.2(±12.7)  | 95.6(±11.4)  | 94.0(±12.7)  | 96.5(±10.4)  | 95.8(±12.0)  |
| <b>Reaction Time (ms±SD)</b> | 356.5(±45.1) | 350.6(±40.7) | 361.4(±38.6) | 352.6(±37.2) | 356.1(±38.0) |

Table 2: **Accuracy and reaction time of responses to cross color change.** Values are mean (±SD).

### 322 **3.2 Base Analyses Results**

323 We performed RCA on responses at harmonics of the base frequency in order to investigate  
324 neural activity related to low-level visual processing; results are summarized in Figure 2.  
325 Panel A displays topographic visualizations of the spatial filters for maximally correlated  
326 (RC1) components (reliability explained: 37.5%). Here, all topographies show maximal

<sup>1</sup>We did find one subject’s accuracy was lower (53.8%) than others. But we still included this participant’s data in our analysis after confirming that this participant showed a cerebral response to the base stimulation (as in Van Rinsveld et al. (2020)). We observed that this participant’s responses to the base rate were not an outlier (i.e., were within one standard deviation) compared with other participants.



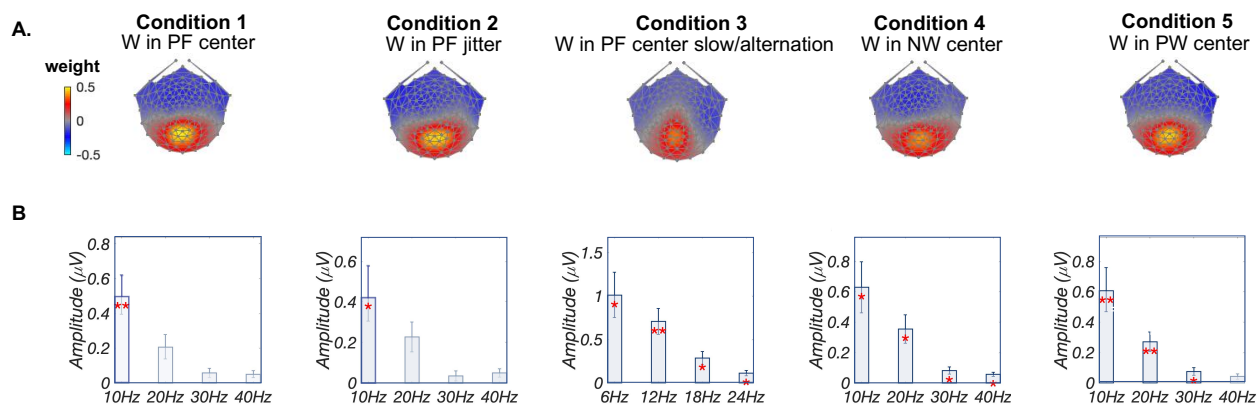

Figure 2: **Base Analysis: Low-level visual processing.** A: Topographic visualizations of the spatial filters for maximally correlated components (RC1) for all conditions. B: Projected amplitude for each harmonic and condition in bar charts, \*:  $p_{FDR} < 0.05$ , \*\*:  $p_{FDR} < 0.01$ .

327 weightings over medial occipital areas; correlations among components for conditions 1, 2, 4,  
 328 and 5 are high ( $r \geq 0.84$ ), and correlation for condition 3 is lower but still high ( $r = 0.78$ ).  
 329 The plots in Panel B present projected amplitudes (i.e., projecting data through the spatial  
 330 filter) in bar plots, with statistically significant responses in the first, second, and fourth  
 331 harmonics ( $p_{FDR} < 0.01$ , corrected for 4 comparisons) in condition 1 (word-in-pseudofont  
 332 center); the first harmonic ( $p_{FDR} < 0.05$ ) in condition 2 (word-in-pseudofont jitter); all four  
 333 harmonics ( $p_{FDR} < 0.05$ ) in conditions 3 (word-in-pseudofont center slower/alternation) and  
 334 4 (word-in-nonword center); and the first three harmonics ( $p_{FDR} < 0.05$ ) in condition 5  
 335 (word-in-pseudoword center). Amplitude comparisons across conditions showed that there  
 336 is no significant difference between conditions 1, 2, 4, and 5 ( $F(3, 60) = 2.21$ ,  $p = 0.09$ ),  
 337 while amplitudes in condition 3 are significantly higher than other conditions ( $p < 0.05$ ).

### 338 3.3 Deviant Analyses Results

339 Deviant analyses were conducted to investigate the mechanisms and sources underlying visual  
 340 word processing. Given increasing evidence supporting segregations within vOT (Lerma-  
 341 Usabiaga et al., 2018) and the discovery of distinct sources for text and letter recognition  
 342 (Barzegaran & Norcia, 2020), we hypothesized that multiple sources should be captured

343 during word-related processing (word-in-pseudofont). Due to previous observations of an  
344 apparent posterior-to-anterior gradient of responses to visually versus linguistically related  
345 sub-regions within vOT (Vinckier et al., 2007; Lerma-Usabiaga et al., 2018), we hypothe-  
346 sized that different condition manipulations (word-in-pseudofont, word-in-nonword, word-  
347 in-pseudoword) would evoke different response topographies and phases.

348 For word deviant responses appearing in a pseudofont base context (word-in-pseudofont,  
349 condition 1), the first two reliable components explained the majority (RC1: 34.7%; RC2:  
350 18.7%) of the reliability in the data. As shown in Figure 3A, the topography of the first  
351 component (RC1) was maximal over left posterior vOT regions, while the second component  
352 (RC2) was distributed over more dorsal parietal regions. Significant signals were present in  
353 the first three harmonics of complex-valued data in RC1 and the first two harmonics of RC2  
354 (Figure 3B, see Methods). More detailed amplitude and phase information are presented  
355 in Figure 3C. For RC1, the projected data contained significant responses in the first three  
356 harmonics (2 Hz, 4 Hz, and 6 Hz;  $p_{FDR} < 0.01$ , corrected for 8 comparisons), while the linear  
357 fit across phase distributions for these three harmonics produced a latency estimate of  $180.51$   
358  $\pm 0.7$  ms. Data projected through the RC2 spatial filter revealed two significant harmonics  
359 at 2 Hz and 4 Hz ( $p_{FDR} < 0.01$ ) and a longer latency estimate of 261.84 ms (standard error  
360 is unavailable when there are two data points). Circular statistics of RC1 and RC2 phase  
361 comparisons showed that RC2 phases are significantly longer (2 Hz: 82.9 ms; 4 Hz: 68.1 ms)  
362 than RC1 (circular t-test;  $p_{FDR} < 0.01$  for both 2 Hz and 4 Hz, corrected for 2 comparisons).

363 As mentioned in Methods, we found that when word-in-pseudofont stimuli were pre-  
364 sented at jittered retinal locations (condition 2), the resulting RC topographies correlated  
365 highly with those computed from responses in the centered condition 1 (RC1:  $r = 0.99$ ;  
366 RC2:  $r = 0.95$ ). Therefore, in Figure 4 we report RCA results of conditions 1 and 2 in  
367 a common component space. As expected, the RC1 and RC2 topographies (Panel A) are  
368 similar to those reported when training the spatial filters on condition 1 alone (as presented  
369 in Figure 3). The summary plots of the responses in the complex plane (Panel B), show

370 overlapping amplitudes (vector lengths) and phases (vector angles) between these two condi-  
371 tions, especially at significant harmonics (first three in RC1 and first two in RC2). In Panel C  
372 response amplitudes did not differ significantly across four harmonics (2 Hz:  $p = 0.70$ ; 4 Hz:  
373  $p = 0.96$ ; 6 Hz:  $p = 0.91$ ; 8 Hz:  $p = 0.65$ ), nor did the derived latency estimations (RC1:  
374 180.42 ms and 173.72 ms for conditions 1 and 2 respectively; RC2: 260.16 ms and 233.32 ms  
375 for conditions 1 and 2 respectively). Thus, we did not find evidence that local adaptation is  
376 appreciable for these stimuli. Additionally, circular statistics of RC1 and RC2 phase com-  
377 parisons showed that RC2 phases are significantly longer (2 Hz: 83.2 ms; 4 Hz: 42.2 ms)  
378 than RC1 ( $p_{FDR} < 0.05$  for both 2 Hz and 4 Hz, corrected for 2 comparisons).

379 Furthermore, these two RCs were also detected when presenting word-in-pseudofont at a  
380 slower alternation presentation rate, with 3 Hz deviant and 6 Hz base (condition 3, Figure 5).  
381 Similar to conditions 1 and 2, topographies between conditions 1 and 3 were highly correlated  
382 (RC1:  $r = 0.99$ ; RC2:  $r = 0.91$ ). Although it was not possible to estimate the latency, as  
383 responses for condition 3 were significant only at the first harmonic (i.e., 3 Hz) for both  
384 components (RC1:  $p_{FDR} < 0.001$ ; RC2:  $p_{FDR} < 0.01$ , Panel C), circular statistics showed  
385 that RC2 phase at 3 Hz is significantly longer (82.0 ms) than RC1 ( $p < 0.001$ ).

386 Finally, for conditions 4 and 5, word deviants appearing in the other two base contexts  
387 (word-in-nonword, word-in-pseudoword) produced components with weaker responses that  
388 were associated with distinct topographies, consistent with the hypothesis that each contrast  
389 was associated with overlapping yet distinct neural sources (Figure 6). Of note, no more  
390 than one significant harmonic is observed for each component: for condition 4 word-in-  
391 nonword, only the third harmonic of RC2 is significant (6 Hz,  $p_{FDR} < 0.05$ , corrected for 8  
392 comparisons); for condition 5 word-in-pseudoword no harmonic is significant ( $p_{FDR} > 0.14$ ,  
393 corrected for 8 comparisons). Due to the lack of significance at multiple harmonics, it was  
394 not possible to estimate latencies for these conditions.

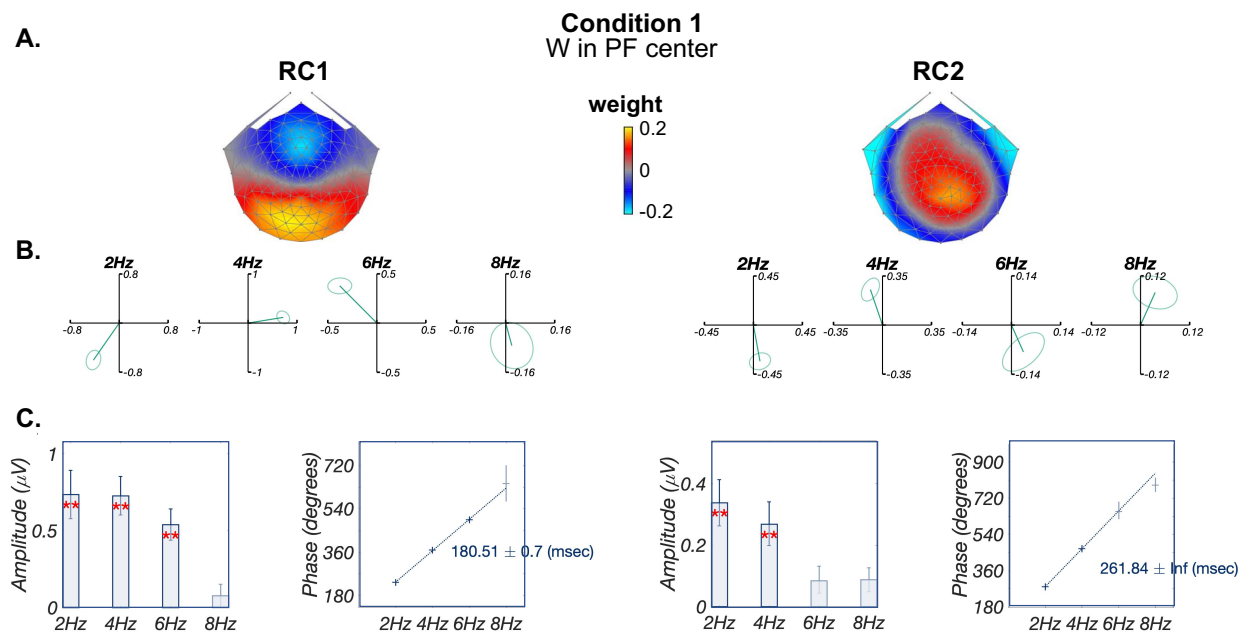

Figure 3: **Deviant Analysis: visual word form processing.** A: Topographic visualizations of the spatial filters for the first two components (RC1 and RC2); B: Response data in the complex plane, where amplitude information is represented as the length of the vectors, and phase information in the angle of the vector relative to 0 radians (counterclockwise from 3 o'clock direction), ellipse indicates standard error of the mean for both amplitude and phase; C: Projected amplitude (left) for each harmonic in bar charts, \*\*:  $p_{FDR} < 0.01$ , as well as latency estimations (right) across successful harmonics.

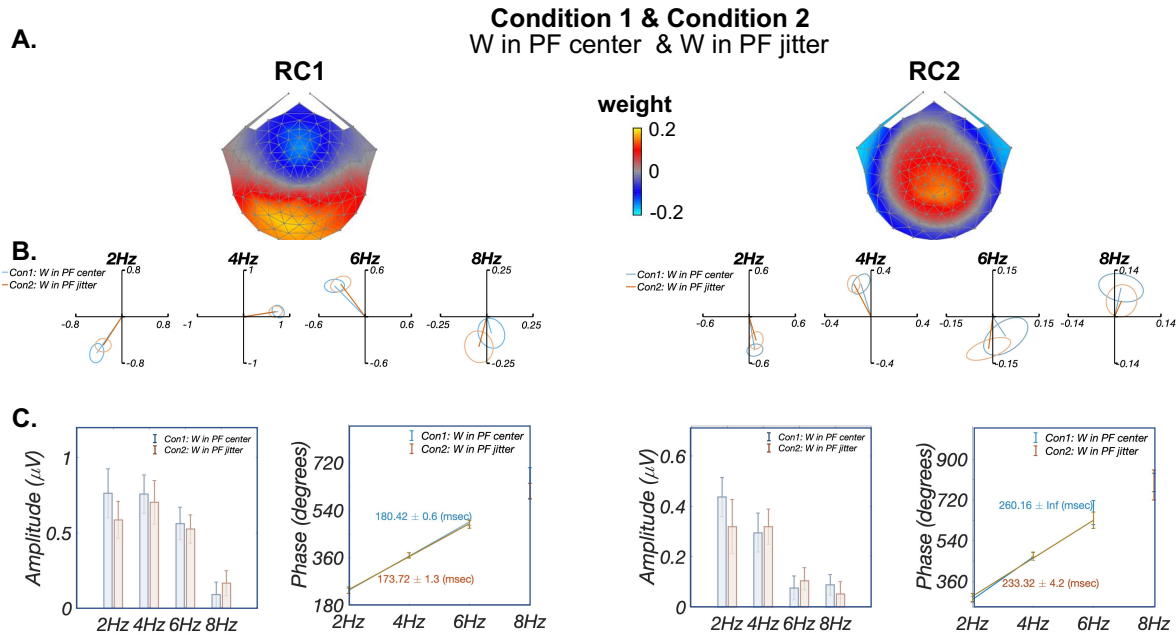

**Figure 4: Deviant Analysis: visual word form processing responses are similar irrespective of stimulus location.** RCA was trained on response data from conditions 1 and 2 together as their RCs were highly similar when trained separately. A: Topographic visualizations of the spatial filters for the first two components (RC1 and RC2); B: Response data in the complex plane, with condition 1 (W in PF center) in blue and condition 2 (W in PF jitter) in red. Amplitude (vector length) and phase (vector angle, counterclockwise from 0 radians at 3 o'clock direction) overlap across conditions especially at significant harmonics (first three harmonics in RC1 and first two harmonics in RC2). Ellipses indicate standard error of the mean; C: Comparison of projected amplitude (left) and latency estimation (right) between two conditions. Response amplitudes did not differ significantly across the four harmonics ( $p > 0.65$ ), latency estimation derived from phase slopes across harmonics were also similar between conditions (RC1: 180.42 ms and 173.72 ms for conditions 1 and 2 respectively; RC2: 260.16 ms and 233.32 ms for conditions 1 and 2 respectively)

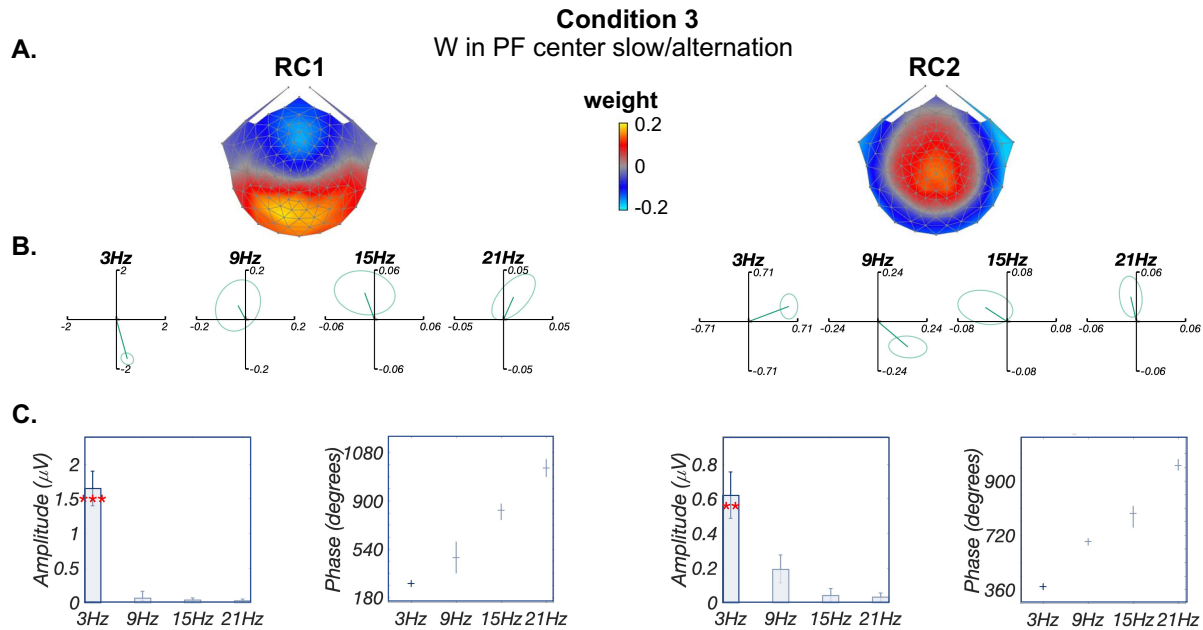

Figure 5: **Deviant Analysis: visual word form processing evidenced by changing presentation rates.** A: Topographic visualizations of the spatial filters for the first two components (RC1 and RC2); B: Response data in the complex plane, where amplitude information is represented as the length of the vectors, and phase information in the angle of the vector relative to 0 radians (counterclockwise from 3 o'clock direction), ellipse indicates standard error of the mean; C: Projected amplitude for each harmonic in bar charts, \*\*:  $p_{FDR} < 0.01$ , \*\*\*:  $p_{FDR} < 0.001$ . Only one significant harmonic prevents us from estimating latency from the phase slope.

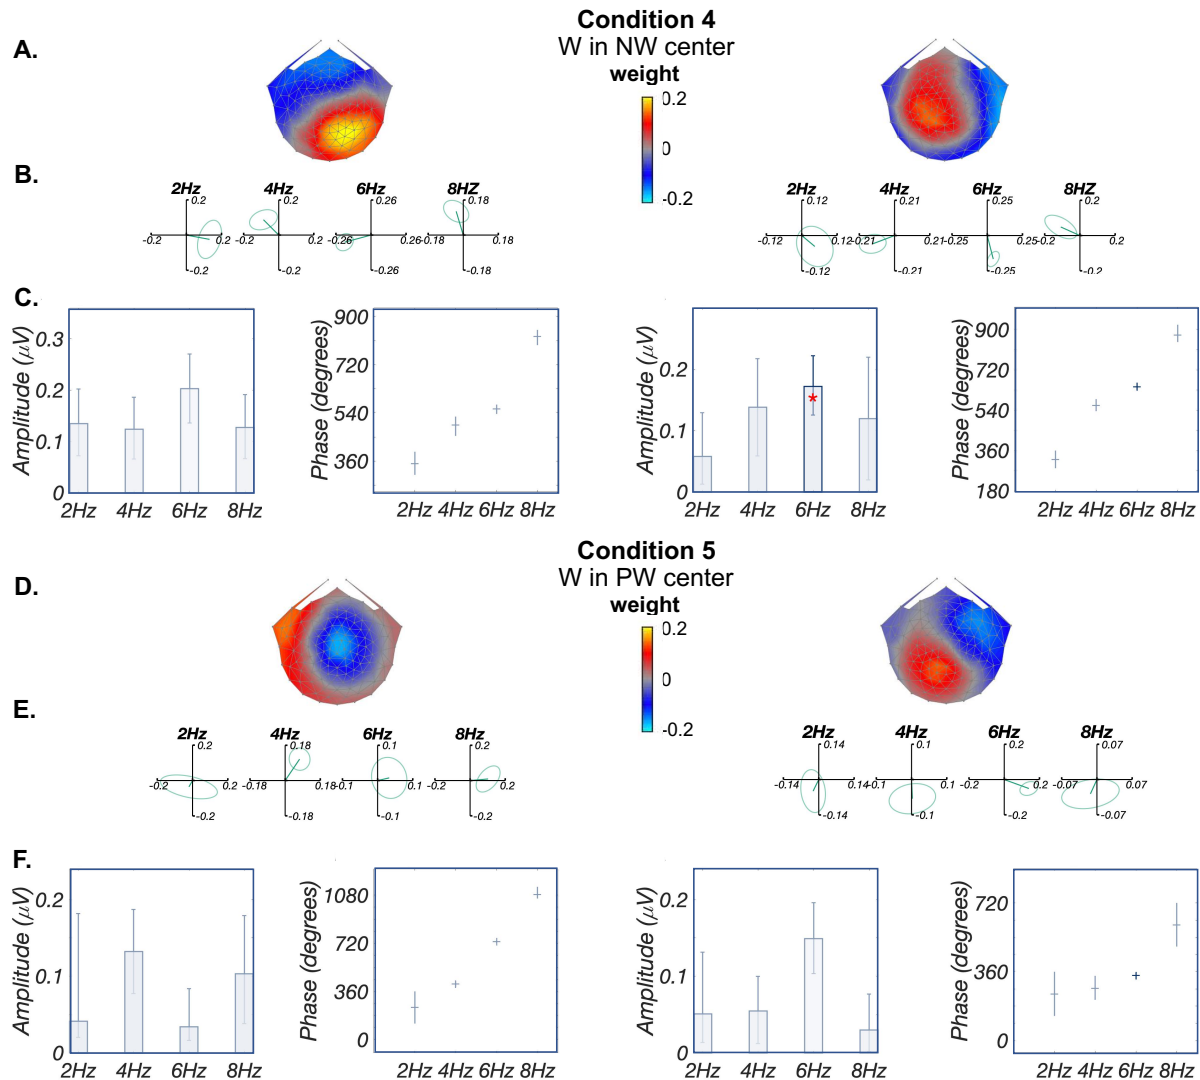

Figure 6: **Deviant Analysis: lexical-semantic processing.** For condition 4 (W in NW center), A&D: Topographic visualizations of the spatial filters for the first two components (RC1 and RC2) for conditions 4 (W in NW center) and 5 (W in PW center), respectively; B&E: Response data in the complex plane for conditions 4 and 5, respectively. Amplitude information is represented as the length of the vectors, and phase information in the angle of the vector relative to 0 radians (3 o'clock direction), ellipse indicates standard error of the mean. Only the third harmonic has signal for both components in condition 4, while seems the second harmonic for RC1 and the third harmonic for RC2 have signal for condition 5; C&F: Projected amplitude for each harmonic in bar charts, \*:  $p_{FDR} < 0.05$ , for condition 4, only the third harmonic is significant in each component; for condition 5, only the third harmonic in RC2 is significant. Having a single significant harmonic prevents us from estimating the phase slope, that's why no latency estimates were provided.

## 395 4 Discussion

396 In this study, we examined the functional and temporal organization of brain sources involved  
397 in visual word recognition by employing a data-driven component analysis of Steady-State  
398 Visual Evoked Potential (SSVEP) data. We recorded SSVEP word deviant responses ap-  
399 pearing in pseudofont base contexts, projecting the multisensor EEG recordings onto single  
400 components using Reliable Components Analysis (RCA). Results at the first four harmonics  
401 of the base frequency revealed one component centered on medial occipital cortex. Results at  
402 harmonics of the deviant frequency revealed two distinct components, with the first compo-  
403 nent maximal earlier in time over left vOT regions, and the second maximal later in time over  
404 dorsal parietal regions. These two components are found to generalize across static versus  
405 jittered presentation locations as well as varying rates of stimulation. In addition, distinct  
406 topographies were revealed during word deviant responses in the other two base contexts  
407 (i.e., pseudowords, nonwords), which—compared with word-in-pseudofont contrast—have  
408 different demands of distinguishing words from visual control stimuli.

### 409 4.1 Low-level visual processing implicates medial occipital areas

410 RCA analyses of EEG responses at the first four harmonics of the base frequency revealed a  
411 maximally reliable component located centered on medial occipital sensors across all condi-  
412 tions. This scalp topography corresponds to expected activations reported in fMRI literature  
413 (López-Barroso et al., 2020; Turkeltaub et al., 2003; Szwed et al., 2011) and in EEG source  
414 localization studies (Rossion et al., 2003; Proverbio & Adorni, 2009). Medial occipital sensors  
415 are directly over early retinotopic visual areas known to support the first stages of visual  
416 processing, including of letter strings and objects (Dehaene et al., 2015). Early stages of  
417 letter/word and object processing primarily involve low-level visual feature analysis, e.g.,  
418 luminance, shape, contour, line junctions and letter fragments (Ben-Shachar et al., 2007;  
419 Ostwald et al., 2008; Szwed et al., 2011). In our study, basic low-level visual stimulus prop-



420 erties such as spatial frequency, spatial dimensions and the sets of basic line-junction features  
421 (Changizi et al., 2006) were well matched across pseudofonts, nonwords and pseudowords  
422 base contexts, as well as between base and deviants within each contrast. This may ex-  
423 plain comparable responses in terms of amplitudes and topographies across conditions with  
424 the same presentation rates. The amplitudes in condition 3 (word-in-pseudofont alternation  
425 presentation mode) are higher than other conditions, which may result from higher signal-  
426 to-noise ratio in one stimulation cycle of alternation presentation mode Yeatman & Norcia  
427 (2016). Nevertheless, consistent responses—in terms of underlying brain sources—across  
428 different contrasts, and at different image update rates and retinal locations support that  
429 current medial occipital activation reflects low-level visual features processing rather than  
430 higher-level word-related processing.

## 431 **4.2 Visual word form processing implicates two distinct sources** 432 **and processing times**

433 RCA of word deviants in the word-in-pseudofont contrast produced two distinct components  
434 with differing latencies. The first component was maximal over ventral occipito-temporal  
435 (vOT) regions with slight left lateralization. Phase lag quantification of the first component  
436 revealed a linear fit of phases across successive harmonics, providing evidence of a latency  
437 estimation around 180 ms.

438 This 180-ms latency is consistent with the timing of the N170 component revealed in ERP  
439 data, which typically peaks around 140–180 ms especially in adults (Eberhard-Moscicka et  
440 al., 2015; Maurer et al., 2005). With its characteristic topography over the left occipitotem-  
441 poral scalp, the N170 is considered to be an electrophysiological correlate of left vOT special-  
442 ized activation for printed words in fMRI studies, as evidenced by magnetoencephalography  
443 (MEG, Hirshorn et al. (2016)), EEG source localization (Brem et al., 2009; Maurer et al.,  
444 2005) and simultaneous EEG-fMRI recordings (Pleisch et al., 2019).

445 Word deviant responses attributed over left-lateralized vOT area in the current study are

446 consistent with numerous fMRI studies showing that the left vOT plays a critical role in fast  
447 and efficient visual recognition of words (Cohen et al., 2000, 2002), indicated by selective  
448 responses to visually presented words compared with random letter strings and symbols (e.g.,  
449 pseudofonts) (Dehaene & Cohen, 2011; Rauschecker et al., 2012). This left occipito-temporal  
450 activation has also been revealed in SSVEP studies of word recognition (Lochy et al., 2015,  
451 2016). Additionally, using the same RCA approach as in the current study, Barzegaran &  
452 Norcia (2020) also reported responses at left vOT cortex when viewing images containing  
453 sets of intact versus scrambled letters (Barzegaran & Norcia, 2020). Consistent findings in  
454 fMRI, ERP, and SSVEP studies support the reliable involvement of left vOT in processing  
455 of words and letters. This specificity of left vOT for words and letters over other visual  
456 stimuli is an outcome of literacy acquisition (Dehaene et al., 2015) and emerges rapidly after  
457 a short term of reading training (Brem et al., 2010; Chyl et al., 2018; Pleisch et al., 2019), a  
458 finding which has also been reported in different writing systems (Bolger et al., 2005; Szwed  
459 et al., 2014).

460 In addition to the first component, we also observed a second RC that was maximal  
461 over dorsal parietal regions. A linear fit across phases of successive harmonics demonstrated  
462 a latency estimation of around 260 ms, which is consistent with EEG and MEG studies  
463 showing phonological effects occurring 250–350 ms after the onset of a visual word (Ashby &  
464 Martin, 2008; Grainger et al., 2006; Sliwinska et al., 2012). Finding of a second component  
465 is consistent with the increasing evidence showing that visual word recognition is not only  
466 limited to the left vOT. Instead, other higher-level linguistic representation areas also support  
467 final word recognition (Long et al., 2020; Lerma-Usabiaga et al., 2018; Price & Devlin, 2011).  
468 For example, a recent fMRI study showed that, connected with the middle and anterior vOT,  
469 other language areas (e.g., the supramarginal, angular gyrus, and inferior frontal gyrus) are  
470 responsible for lexical information processing especially for real words (Lerma-Usabiaga et  
471 al., 2018). Additionally, anterior vOT is structurally connected to temporo-parietal regions,  
472 including the angular gyrus (AG, Booth et al. (2004); Yeatman et al. (2013); Lerma-Usabiaga

473 et al. (2018)), the supramarginal gyri (SMG, Kawabata Duncan et al. (2014); Seghier & Price  
474 (2013)) and the superior temporal gyrus (STS, Stevens et al. (2017)). Those areas have been  
475 involved in mapping between orthographic, phonological and semantic representations for  
476 written words and letter strings (Church et al., 2011; Raij et al., 2000; Van Atteveldt et al.,  
477 2004; Vandermosten et al., 2016). In relation to this, an intracranial EEG study suggested  
478 the left vOT is involved in at least two distinct stages of word processing: an early stage  
479 that is dedicated to gist-level word feature extraction, and a later stage involved in accessing  
480 more precise representations of a word by recurrent interactions with higher-level visual and  
481 nonvisual regions (Hirshorn et al., 2016). The dorsal parietal brain sources in our study may  
482 reflect the later stage of integrating information between anterior vOT (Lerma-Usabiaga et  
483 al., 2018) and other language areas (Kay & Yeatman, 2016; Schurz et al., 2014; Woodhead et  
484 al., 2014) to enable orthographic-lexical-semantic transformations (Woolnough et al., 2020).

485 A leading model, the Local Combination Detector (LCD) model (Dehaene et al., 2005),  
486 has been proposed to explain the neural mechanisms underlying visual specialization for  
487 words. This model suggests that the receptive fields of neurons (detectors) especially in  
488 the left vOT progressively increase from posterior to anterior regions. As a result, the  
489 sensitivity of neurons increases from familiar letter fragments and fragments combinations  
490 to more complex letter strings (e.g, bigrams and morphemes) and whole words. However,  
491 given the functional and structural connections between vOT (especially anterior regions)  
492 and other language areas mentioned above (i.e., AG, SMG, and STS), a considerable number  
493 of studies support the interactive theory in which feed-forward and feed-back processing  
494 mechanisms together contribute to final recognition of a word (Dehaene et al., 2005; Dehaene  
495 & Cohen, 2011; Dehaene et al., 2015; Long et al., 2020). Specifically, the forward pathway  
496 conveys bottom-up progression from early visual cortex (e.g., visual area 4, V4) to vOT,  
497 which accumulates inputs about the elementary forms of words (Schurz et al., 2014), and  
498 continually from vOT to higher-level linguistic representation areas, which enable integration  
499 of orthographic stimuli with phonological and lexical representations (Price & Devlin, 2011).

500 Meanwhile, vOT also receives top-down modulations (backward pathways) from higher-level  
501 language regions, which provide (phonology and/or semantic) predictive feedback to the  
502 processing of visual attributes.

503 To summarize, two components were derived in a data-driven fashion from the SSVEP.  
504 The first component is located at more left vOT region, while the second component is  
505 located more at parietal dorsal area. We speculate that the first component reflects more  
506 hierarchical bottom-up forward projections from early visual cortex to posterior vOT, while  
507 the second component represents both bottom-up and top-down integration between anterior  
508 vOT with other areas of language network. However, these interpretations are speculative  
509 without the evidence of source localization data. Thus, more evidence (e.g., source localiza-  
510 tion and functional connectivity) are needed for verification in future studies.

### 511 **4.3 Reliable Components are invariant to stimulus location and** 512 **presentation rate**

513 Our results replicated and extended previous work on multiple distinct brain sources involved  
514 in different stages of word processing. These findings were further corroborated by present-  
515 ing stimuli at jittered locations. The response invariance we observe is in agreement with  
516 previous studies, in which left vOT activation was identical whether stimuli were presented  
517 in the right or left hemifield, suggesting that left vOT activation for words and readable  
518 pseudowords depends on language-dependent parameters and not visual features of stimuli  
519 (Cohen et al., 2000, 2002). In line with this, Maurer and colleagues (2008) directly com-  
520 pared responses to words and faces under two contexts: blocks that alternated faces and  
521 words versus blocks of only faces or words. Results demonstrated that responses to words  
522 were consistently left-lateralized and were not manipulated by context in skilled readers. In  
523 contrast, context (Maurer et al., 2008) and spatial orientation (Jacques & Rossion, 2007)  
524 systematically influenced the degree to which a face is processed. Findings of this kind  
525 further suggest that responses to words depend more on linguistic rather than contextual

526 factors (Hauk et al., 2006), which may be driven by the way that words are learned and  
527 read (Maurer et al., 2008). Anatomically, it has also been proposed that the visual word  
528 form system is homologous to inferotemporal areas in the monkey, where cells are selective  
529 to high-level features and invariant to size and position (Cohen et al., 2000). The similar-  
530 ity of the component structure (brain sources) under different presentation rates suggests a  
531 fairly broad temporal filter is involved in word vs pseudofont discrimination. Of note, the  
532 amplitudes when slowing down the presentation rates are stronger than using higher rates,  
533 which sheds light on the choice of the stimulus frequency for studies with children and for  
534 examining higher-level visual processes (see also Norcia et al. (2015)).

#### 535 **4.4 Hierarchy of visual word processing**

536 Given the word-in-pseudofont contrast results above consistently identified and distinguished  
537 two components with distinct topographies and time courses—with the possibility of one  
538 being related to processing word visual forms and the other potentially related to higher  
539 level integration with language regions—we went on to test whether the hierarchical stimulus  
540 contrast approach might also clearly isolate one of these components.

541 Neither word-in-nonword nor word-in-pseudoword sequences successfully evoke com-  
542 ponent topographies that resembled either the early or late components of the word-in-  
543 pseudofont contrast. Specially, word-in-nonword contrast revealed two components over right  
544 occipito-temporal (RC1) and left centro-parietal (RC2) regions, while word-in-pseudoword  
545 contrast revealed two components over right centro-frontal (RC1) and left occipito-temporal  
546 (RC2) regions. However, component-space neural activations for these two conditions were  
547 much weaker and less robust, so caution is needed in their interpretation.

548 Nevertheless, our weak results in word-in-nonword and word-in-pseudoword contrasts are  
549 consistent with a recent study by Barnes et al. (2021). Barnes and colleagues (2021) also  
550 used a 4-letter English word vs pseudoword contrast, and the same frequency rates (2 Hz  
551 word deviants in 10 Hz pseudoword base) as in our study, results finding that only 4 out of

552 40 data sets showing a reliable effect between words and pseudowords. While another study  
553 by Lochy et al. (2015), which used 5-letter french words and pseudowords with the same  
554 2 Hz/10 Hz rates, revealed response differences between words and pseudowords in 8 out 10  
555 readers. Barnes and colleagues argued that the matching of bigram frequency between words  
556 and pseudowords (matched in their study but not in Lochy et al. (2015)) could explain the  
557 disparity. Bigram frequency was also matched in our study, which further support Barnes's  
558 argument. Additionally, other factors may also play a role in the disparity, such as number of  
559 letters (4 in ours and Barnes et al. (2021), 5 in Lochy et al. (2015)) and number of syllables  
560 (monosyllabic in ours and Barnes et al. (2021), monosyllabic and bisyllabic in Lochy et al.  
561 (2015)).

562 Evoked response differences between words and pseudowords and/or nonwords have also  
563 been studied previously in ERP studies, but the results have been inconsistent (absent in  
564 Araújo et al. (2012); Bentin et al. (1999); Wydell et al. (2003)); present in Eberhard-Moscicka  
565 et al. (2015); Kast et al. (2010); McCandliss et al. (1997); Proverbio & Adorni (2009)). Sev-  
566 eral reasons for the mixed results have been proposed, including but not limited to language  
567 transparency, presentation modes and task demands. For example, it was found that the  
568 adult N1/left vOT for words is more sensitive to orthographic than lexical and/or semantic  
569 contrasts, especially during implicit reading (Bentin et al., 1999; Maurer et al., 2005). Of  
570 note, an implicit color detection task was used in the present study, and the pseudowords  
571 and nonwords were created by reordering letters that appeared in the words; these factors,  
572 in combination, might have led to more difficult discrimination. In addition, words and  
573 pseudowords have elicited relatively smaller N170 amplitudes in less transparent English  
574 than in German (Maurer 2005). Compared with more transparent languages (e.g., Italian,  
575 German and French), English has greater orthographic depth with inconsistent spelling-to-  
576 sound correspondence, leading to more ambiguous pronunciations. As a consequence of the  
577 inconsistency of mapping letters to sounds, lexical or semantic processing will be less auto-  
578 matic and more demanding (Nosarti et al., 2010), which is even more extreme when reading

579 novel pseudowords and nonwords.

580 In addition, fast stimulus presentation rates (10 Hz, i.e., 100 ms each item) used in the  
581 current study may reduce the involvement of higher-level (e.g., semantic) processes (Vinckier  
582 et al., 2007; Lochy et al., 2018) tapped by the word-in-nonword and word-in-pseudoword  
583 contrasts, especially during implicit tasks not requiring explicit pronunciation and semantic  
584 detection of the stimuli. Lower stimulation rates may be necessary to record SSVEP when  
585 discriminating higher-level lexical properties in word-in-nonword and word-in-pseudoword  
586 contrasts. By contrast, discrimination of word vs pseudofont is robust over the range of  
587 presentation rates we examined. Future studies can examine this issue further by varying  
588 stimulation rates over broader ranges or by manipulating task demands.

## 589 **4.5 Future work**

590 In the present study, visual word recognition (W vs PF) was examined using the SSVEP  
591 paradigm and a spatial filtering approach, which enabled the identification of robust neural  
592 sources supporting distinct levels of word processing within only several minutes' stimula-  
593 tion. This approach provided a unique extension of existing knowledge on word recognition  
594 regarding retinal location and stimulation rate and points to avenues for further investigation  
595 of important questions in reading.

596 First of all, given the short stimulation requirement and robust signal detection due  
597 to the high SNR of SSVEP and the spatial filtering approach, the current study points  
598 to new possibilities to study individual differences and developmental changes as children  
599 learn to read. Children's reading expertise develops dramatically, especially during the  
600 first year(s) of formal reading acquisition (Eberhard-Moscicka et al., 2015; Maurer et al.,  
601 2006). The high SNR paradigm used here may allow for more efficient (in terms of less  
602 time-consuming and less trials requirement) tracing of the developmental changes of brain  
603 circuitry due to increasing reading expertise in children at different stages of learning to read.  
604 Additionally, in the course of emerging specialization for printed words, neural component

605 topographies would be expected to be increasingly left-lateralized (Maurer et al., 2005). The  
606 RCA approach of detecting multiple, distinct brain sources within the same signal response  
607 can increase understanding of how exactly such lateralization is best developed through  
608 reading training. Furthermore, high inter-subject variability of vOT print sensitivity was  
609 revealed in previous studies (Dehaene-Lambertz et al., 2018; Glezer & Riesenhuber, 2013;  
610 Pleisch et al., 2019; Stevens et al., 2017; van de Walle de Ghelcke et al., 2020). Therefore,  
611 exploring developmental changes—in terms of activity and topography—at the individual  
612 subject level will offer a chance to investigate this phenomenon more precisely and deeply.  
613 This approach would be especially relevant to early autistic and dyslexic readers, who face  
614 difficulties at the beginning of reading education (Frith & Snowling, 1983) when intervention  
615 is thought to be most successful.

616 Another interesting direction to explore in future research rests upon the accumulating  
617 evidence that early visual-orthographic (“perceptual”) and later lexicon-semantic (“lexical”)  
618 processing is located at segregated regions within vOT (Lerma-Usabiaga et al., 2018; Stigliani  
619 et al., 2015; Vinckier et al., 2007). To our knowledge, different functional components of  
620 word recognition have been studied using general contrast of words with pseudofonts and/or  
621 consonant strings (Lerma-Usabiaga et al., 2018), but not yet by directly manipulating ortho-  
622 graphic regularity and lexical representation(s) separately. Additionally, studies have shown  
623 that perceptual tuning of posterior vOT to sublexical and lexical orthographic features de-  
624 velops when reading experience increases (Binder et al., 2006; Zhao et al., 2019). Therefore,  
625 isolating perceptual and lexical processing experimentally will be interesting to explore to  
626 understand how children’s brains develop specialized visual-orthographic processing.

627 Last but not least, topographic lateralization and amplitudes of responses to text have  
628 been shown to differ when presenting stimuli with different temporal frequencies (Yeatman  
629 & Norcia, 2016). In addition, it has been proposed that lower stimulation rates may be  
630 necessary to record SSVEPs when studying higher-level visual processes (e.g., faces and  
631 words) (Norcia et al., 2015). The relatively high stimulation frequency (i.e., 10 Hz) used



632 in the current study may underestimate effects especially associated with more complex  
633 “lexical” contrasts (herein word vs pseudoword and word vs nonword) (Lochy et al., 2018),  
634 and this may have an even higher impact when it comes to children. Thus, an important  
635 question for future work is to see how children develop specialized visual-orthographic and  
636 lexical-semantic processing under lower stimulation rates.

## 637 5 Conclusion

638 In conclusion, the present study applied RCA—a data-driven component approach—on  
639 SSVEPs, showing that two distinct functional processes with different temporal informa-  
640 tion underlie visual word form recognition, specifically the word in pseudofont contrast.  
641 Those two processes are found to be robust across manipulations of stimulus location as well  
642 as stimulation frequency and deviant-base ratio. Moreover, when the same approach was  
643 applied to other two contrasts (word in nonword and word in pseudoword), distinct neural  
644 sources were found, though their activations were less robust. Our results have provided  
645 new evidence that different functional circuits support different stages of word processing.  
646 These findings point to novel possibilities toward understanding how visual-orthographic and  
647 lexical-semantic processing are best developed through learning experience, which could hold  
648 important insights into the acquisition of reading skill.

## 649 References

- 650 Alonso-Prieto, E., Van Belle, G., Liu-Shuang, J., Norcia, A. M., & Rossion, B. (2013). The 6 hz funda-  
651 mental stimulation frequency rate for individual face discrimination in the right occipito-temporal cortex.  
652 *Neuropsychologia*, *51*(13), 2863–2875.
- 653 Araújo, S., Bramão, I., Faísca, L., Petersson, K. M., & Reis, A. (2012). Electrophysiological correlates of  
654 impaired reading in dyslexic pre-adolescent children [Journal Article]. *Brain and cognition*, *79*(2), 79-88.
- 655 Ashby, J., & Martin, A. E. (2008). Prosodic phonological representations early in visual word recognition.  
656 *Journal of Experimental Psychology: Human perception and performance*, *34*(1), 224.

- 657 Baker, C. I., Liu, J., Wald, L. L., Kwong, K. K., Benner, T., & Kanwisher, N. (2007). Visual word processing  
658 and experiential origins of functional selectivity in human extrastriate cortex. *Proceedings of the National*  
659 *Academy of Sciences*, *104*(21), 9087–9092.
- 660 Barnes, L., Petit, S., Badcock, N. A., Whyte, C. J., & Woolgar, A. (2021). Word detection in individual  
661 subjects is difficult to probe with fast periodic visual stimulation. *Frontiers in Neuroscience*, *15*, 182.
- 662 Barzegaran, E., & Norcia, A. M. (2020). Neural sources of letter and vernier acuity. *Scientific reports*, *10*(1),  
663 1–11.
- 664 Benjamini, Y., & Yekutieli, D. (2001). The control of the false discovery rate in multiple testing under  
665 dependency. *Annals of statistics*, 1165–1188.
- 666 Ben-Shachar, M., Dougherty, R. F., Deutsch, G. K., & Wandell, B. A. (2007). Differential sensitivity to  
667 words and shapes in ventral occipito-temporal cortex. *Cerebral Cortex*, *17*(7), 1604–1611.
- 668 Bentin, S., Mouchetant-Rostaing, Y., Giard, M.-H., Echallier, J.-F., & Pernier, J. (1999). Erp manifestations  
669 of processing printed words at different psycholinguistic levels: time course and scalp distribution [Journal  
670 Article]. *Journal of Cognitive Neuroscience*, *11*(3), 235–260.
- 671 Berens, P., et al. (2009). Circstat: a matlab toolbox for circular statistics. *J Stat Softw*, *31*(10), 1–21.
- 672 Binder, J. R., Medler, D. A., Westbury, C. F., Liebenthal, E., & Buchanan, L. (2006). Tuning of the human  
673 left fusiform gyrus to sublexical orthographic structure [Journal Article]. *Neuroimage*, *33*(2), 739–748.
- 674 Blankertz, B., Losch, F., Krauledat, M., Dornhege, G., Curio, G., & Müller, K.-R. (2008). The berlin brain-  
675 computer interface: Accurate performance from first-session in bci-naive subjects. *IEEE transactions on*  
676 *biomedical engineering*, *55*(10), 2452–2462.
- 677 Bolger, D. J., Perfetti, C. A., & Schneider, W. (2005). Cross-cultural effect on the brain revisited: Universal  
678 structures plus writing system variation. *Human Brain Mapping*, *25*(1), 92–104. Retrieved from [https://](https://onlinelibrary.wiley.com/doi/abs/10.1002/hbm.20124)  
679 [onlinelibrary.wiley.com/doi/abs/10.1002/hbm.20124](https://onlinelibrary.wiley.com/doi/abs/10.1002/hbm.20124) doi: <https://doi.org/10.1002/hbm.20124>
- 680 Booth, J. R., Burman, D. D., Meyer, J. R., Gitelman, D. R., Parrish, T. B., & Mesulam, M. M. (2004).  
681 Development of brain mechanisms for processing orthographic and phonologic representations. *Journal*  
682 *of cognitive neuroscience*, *16*(7), 1234–1249.
- 683 Brem, S., Bach, S., Kucian, K., Kujala, J. V., Guttorm, T. K., Martin, E., . . . Richardson, U. (2010). Brain  
684 sensitivity to print emerges when children learn letter–speech sound correspondences. *Proceedings of the*  
685 *National Academy of Sciences*, *107*(17), 7939–7944.
- 686 Brem, S., Bucher, K., Halder, P., Summers, P., Dietrich, T., Martin, E., & Brandeis, D. (2006). Evidence  
687 for developmental changes in the visual word processing network beyond adolescence [Journal Article].  
688 *Neuroimage*, *29*(3), 822–837.
- 689 Bro, R., Acar, E., & Kolda, T. G. (2008). Resolving the sign ambiguity in the singular value decomposition.  
690 *Journal of Chemometrics*, *22*(2), 135–140. Retrieved from [https://onlinelibrary.wiley.com/doi/](https://onlinelibrary.wiley.com/doi/abs/10.1002/cem.1122)  
691 [abs/10.1002/cem.1122](https://onlinelibrary.wiley.com/doi/abs/10.1002/cem.1122) doi: <https://doi.org/10.1002/cem.1122>
- 692 Centanni, T. M., King, L. W., Eddy, M. D., Whitfield-Gabrieli, S., & Gabrieli, J. D. (2017). Development  
693 of sensitivity versus specificity for print in the visual word form area. *Brain and Language*, *170*, 62–70.
- 694 Changizi, M. A., Zhang, Q., Ye, H., & Shimojo, S. (2006). The structures of letters and symbols throughout  
695 human history are selected to match those found in objects in natural scenes. *The American Naturalist*,  
696 *167*(5), E117–E139.

- 697 Chee, Q. W., Chow, K. J., Yap, M. J., & Goh, W. D. (2020). Consistency norms for 37,677 english words.  
698 *Behavior Research Methods*, 1–21.
- 699 Church, J. A., Balota, D. A., Petersen, S. E., & Schlaggar, B. L. (2011). Manipulation of length and lexicality  
700 localizes the functional neuroanatomy of phonological processing in adult readers. *Journal of cognitive*  
701 *neuroscience*, 23(6), 1475–1493.
- 702 Chyl, K., Kossowski, B., Debska, A., Luniewska, M., Banaszkiwicz, A., Żelechowska, A., . . . others (2018).  
703 Prereader to beginning reader: changes induced by reading acquisition in print and speech brain networks.  
704 *Journal of Child Psychology and Psychiatry*, 59(1), 76–87.
- 705 Cohen, Dehaene, S., Naccache, L., Lehéricy, S., Dehaene-Lambertz, G., Hénaff, M.-A., & Michel, F. (2000).  
706 The visual word form area: Spatial and temporal characterization of an initial stage of reading in normal  
707 subjects and posterior split-brain patients [Journal Article]. *Brain*, 123(2), 291–307.
- 708 Cohen, Lehéricy, S., Chochon, F., Lemer, C., Rivaud, S., & Dehaene, S. (2002). Language-specific tuning  
709 of visual cortex? functional properties of the visual word form area [Journal Article]. *Brain*, 125(5),  
710 1054–1069.
- 711 Cohen, M. X. (2017). Comparison of linear spatial filters for identifying oscillatory activity in multichannel  
712 data. *Journal of neuroscience methods*, 278, 1–12.
- 713 Cottareau, B. R., McKee, S. P., Ales, J. M., & Norcia, A. M. (2011). Disparity-tuned population responses  
714 from human visual cortex. *Journal of Neuroscience*, 31(3), 954–965.
- 715 Dehaene, S., & Cohen, L. (2011). The unique role of the visual word form area in reading. *Trends in*  
716 *cognitive sciences*, 15(6), 254–262.
- 717 Dehaene, S., Cohen, L., Morais, J., & Kolinsky, R. (2015). Illiterate to literate: behavioural and cerebral  
718 changes induced by reading acquisition. *Nature Reviews Neuroscience*, 16(4), 234–244.
- 719 Dehaene, S., Cohen, L., Sigman, M., & Vinckier, F. (2005). The neural code for written words: a proposal.  
720 *Trends in cognitive sciences*, 9(7), 335–341.
- 721 Dehaene, S., Jobert, A., Naccache, L., Ciuciu, P., Poline, J.-B., Le Bihan, D., & Cohen, L. (2004). Letter  
722 binding and invariant recognition of masked words: behavioral and neuroimaging evidence. *Psychological*  
723 *science*, 15(5), 307–313.
- 724 Dehaene, S., Naccache, L., Cohen, L., Le Bihan, D., Mangin, J.-F., Poline, J.-B., & Rivière, D. (2001).  
725 Cerebral mechanisms of word masking and unconscious repetition priming. *Nature neuroscience*, 4(7),  
726 752–758.
- 727 Dehaene, S., Pegado, F., Braga, L. W., Ventura, P., Nunes Filho, G., Jobert, A., . . . Cohen, L. (2010). How  
728 learning to read changes the cortical networks for vision and language. *science*, 330(6009), 1359–1364.
- 729 Dehaene-Lambertz, G., Monzalvo, K., & Dehaene, S. (2018). The emergence of the visual word form:  
730 Longitudinal evolution of category-specific ventral visual areas during reading acquisition. *PLoS biology*,  
731 16(3), e2004103.
- 732 Dmochowski, J. P., Greaves, A. S., & Norcia, A. M. (2015, April). Maximally reliable spatial filtering of  
733 steady state visual evoked potentials. *NeuroImage*, 109, 63–72. doi: 10.1016/j.neuroimage.2014.12.078
- 734 Dmochowski, J. P., Sajda, P., Dias, J., & Parra, L. C. (2012). Correlated components of ongoing eeg point  
735 to emotionally laden attention—a possible marker of engagement? *Frontiers in human neuroscience*, 6,  
736 112.

- 737 Eberhard-Moscicka, A. K., Jost, L. B., Raith, M., & Maurer, U. (2015). Neurocognitive mechanisms of  
738 learning to read: print tuning in beginning readers related to word-reading fluency and semantics but not  
739 phonology. *Developmental science*, *18*(1), 106–118.
- 740 Farzin, F., Hou, C., & Norcia, A. M. (2012). Piecing it together: infants’ neural responses to face and object  
741 structure. *Journal of Vision*, *12*(13), 6–6.
- 742 Frith, U., & Snowling, M. (1983). Reading for meaning and reading for sound in autistic and dyslexic  
743 children. *British journal of developmental psychology*, *1*(4), 329–342.
- 744 Glezer, L. S., & Riesenhuber, M. (2013). Individual variability in location impacts orthographic selectivity  
745 in the “visual word form area”. *Journal of Neuroscience*, *33*(27), 11221–11226.
- 746 Grainger, J., Kiyonaga, K., & Holcomb, P. J. (2006). The time course of orthographic and phonological  
747 code activation. *Psychological Science*, *17*(12), 1021–1026.
- 748 Guillaume, M., Mejias, S., Rossion, B., Dzhelyova, M., & Schiltz, C. (2018). A rapid, objective and implicit  
749 measure of visual quantity discrimination. *Neuropsychologia*, *111*, 180–189.
- 750 Hauk, O., Patterson, K., Woollams, A., Watling, L., Pulvermüller, F., & Rogers, T. T. (2006). [q:] when  
751 would you prefer a sossage to a sausage?[a:] at about 100 msec. erp correlates of orthographic typicality  
752 and lexicality in written word recognition. *Journal of Cognitive Neuroscience*, *18*(5), 818–832.
- 753 Hirshorn, E. A., Li, Y., Ward, M. J., Richardson, R. M., Fiez, J. A., & Ghuman, A. S. (2016). Decoding  
754 and disrupting left midfusiform gyrus activity during word reading [Journal Article]. *Proceedings of the  
755 National Academy of Sciences*, *113*(29), 8162–8167.
- 756 Jacques, C., & Rossion, B. (2007). Early electrophysiological responses to multiple face orientations correlate  
757 with individual discrimination performance in humans. *Neuroimage*, *36*(3), 863–876.
- 758 Kast, M., Elmer, S., Jancke, L., & Meyer, M. (2010). Erp differences of pre-lexical processing between  
759 dyslexic and non-dyslexic children. *International Journal of Psychophysiology*, *77*(1), 59–69.
- 760 Kawabata Duncan, K. J., Twomey, T., Parker Jones, Seghier, M. L., Haji, T., Sakai, K., . . . Devlin, J. T.  
761 (2014). Inter-and intrahemispheric connectivity differences when reading japanese kanji and hiragana.  
762 *Cerebral Cortex*, *24*(6), 1601–1608.
- 763 Kay, K. N., & Yeatman, J. D. (2016). Bottom-up and top-down computations in high-level visual cortex.  
764 *bioRxiv*, 053595.
- 765 Keuleers, E., & Brysbaert, M. (2010). Wuggy: A multilingual pseudoword generator. *Behavior research  
766 methods*, *42*(3), 627–633.
- 767 Kilner, J. (2013). Bias in a common eeg and meg statistical analysis and how to avoid it. *Clinical neurophys-  
768 iology: official journal of the International Federation of Clinical Neurophysiology*, *124*(10), 2062–2063.
- 769 Krafnick, A. J., Tan, L.-H., Flowers, D. L., Luetje, M. M., Napoliello, E. M., Siok, W.-T., . . . Eden, G. F.  
770 (2016). Chinese character and english word processing in children’s ventral occipitotemporal cortex: fMRI  
771 evidence for script invariance. *Neuroimage*, *133*, 302–312.
- 772 Lehmann, D., & Skrandies, W. (1980). Reference-free identification of components of checkerboard-evoked  
773 multichannel potential fields. *Electroencephalography and clinical neurophysiology*, *48*(6), 609–621.
- 774 Lerma-Usabiaga, G., Carreiras, M., & Paz-Alonso, P. M. (2018). Converging evidence for functional and  
775 structural segregation within the left ventral occipitotemporal cortex in reading. *Proceedings of the Na-  
776 tional Academy of Sciences*, *115*(42), E9981–E9990.

- 777 Liu-Shuang, J., Norcia, A. M., & Rossion, B. (2014). An objective index of individual face discrimination in  
778 the right occipito-temporal cortex by means of fast periodic oddball stimulation. *Neuropsychologia*, *52*,  
779 57–72.
- 780 Lochy, A., Jacques, C., Maillard, L., Colnat-Coulbois, S., Rossion, B., & Jonas, J. (2018). Selective  
781 visual representation of letters and words in the left ventral occipito-temporal cortex with intracerebral  
782 recordings. *Proceedings of the National Academy of Sciences*, *115*(32), E7595–E7604.
- 783 Lochy, A., Schiltz, C., & Rossion, B. (2020). The right hemispheric dominance for face perception in  
784 preschool children depends on the visual discrimination level. *Developmental Science*, *23*(3), e12914.
- 785 Lochy, A., Van Belle, G., & Rossion, B. (2015). A robust index of lexical representation in the left occipito-  
786 temporal cortex as evidenced by eeg responses to fast periodic visual stimulation. *Neuropsychologia*, *66*,  
787 18–31. Retrieved from <http://www.sciencedirect.com/science/article/pii/S0028393214004199>  
788 doi: <https://doi.org/10.1016/j.neuropsychologia.2014.11.007>
- 789 Lochy, A., Van Reybroeck, M., & Rossion, B. (2016). Left cortical specialization for visual letter strings  
790 predicts rudimentary knowledge of letter-sound association in preschoolers. *Proceedings of the National*  
791 *Academy of Sciences*, *113*(30), 8544–8549.
- 792 Long, L., Yang, M., Kriegeskorte, N., Jacobs, J., Remez, R., Sperling, M., ... Worrell, G. (2020). Feed-  
793 forward, feed-back, and distributed feature representation during visual word recognition revealed by  
794 human intracranial neurophysiology [Journal Article].
- 795 López-Barroso, D., de Schotten, M. T., Morais, J., Kolinsky, R., Braga, L. W., Guerreiro-Tauil, A., ...  
796 Cohen, L. (2020). Impact of literacy on the functional connectivity of vision and language related  
797 networks. *NeuroImage*, 116–722.
- 798 Masterson, J., Stuart, M., Dixon, M., & Lovejoy, S. (2010). Children’s printed word database: Continuities  
799 and changes over time in children’s early reading vocabulary. *British Journal of Psychology*, *101*(2),  
800 221–242.
- 801 Maurer, U., Brem, S., Bucher, K., & Brandeis, D. (2005). Emerging neurophysiological specialization for  
802 letter strings [Journal Article]. *Journal of Cognitive Neuroscience*, *17*(10), 1532–1552.
- 803 Maurer, U., Brem, S., Kranz, F., Bucher, K., Benz, R., Halder, P., ... Brandeis, D. (2006). Coarse neural  
804 tuning for print peaks when children learn to read [Journal Article]. *Neuroimage*, *33*(2), 749–758.
- 805 Maurer, U., Rossion, B., & McCandliss, B. D. (2008). Category specificity in early perception: face and  
806 word n170 responses differ in both lateralization and habituation properties [Journal Article]. *Frontiers*  
807 *in Human Neuroscience*, *2*. Retrieved from [http://www.frontiersin.org/Journal/Abstract.aspx](http://www.frontiersin.org/Journal/Abstract.aspx?s=537&name=human_neuroscience&ART_DOI=10.3389/neuro.09.018.2008)  
808 [?s=537&name=human\\_neuroscience&ART\\_DOI=10.3389/neuro.09.018.2008](http://www.frontiersin.org/Journal/Abstract.aspx?s=537&name=human_neuroscience&ART_DOI=10.3389/neuro.09.018.2008) doi: 10.3389/neuro.09.018  
809 .2008
- 810 McCandliss, B. D., Cohen, L., & Dehaene, S. (2003). The visual word form area: expertise for reading in  
811 the fusiform gyrus. *Trends in cognitive sciences*, *7*(7), 293–299.
- 812 McCandliss, B. D., Posner, M. I., & Givon, T. (1997). Brain plasticity in learning visual words. *Cognitive*  
813 *Psychology*, *33*(1), 88–110.
- 814 Mohanchandra, K., Saha, S., & Deshmukh, R. (2014). Twofold classification of motor imagery using common  
815 spatial pattern. In *2014 international conference on contemporary computing and informatics (ic3i)* (pp.  
816 434–439).
- 817 Norcia, A. M., Appelbaum, L. G., Ales, J. M., Cottureau, B. R., & Rossion, B. (2015). The steady-state  
818 visual evoked potential in vision research: A review. *Journal of Vision*, *15*(6), 4.

- 819 Norcia, A. M., Yakovleva, A., Hung, B., & Goldberg, J. L. (2020). Dynamics of contrast decrement and  
820 increment responses in human visual cortex. *Translational Vision Science & Technology*, *9*(10), 6–6.
- 821 Nosarti, C., Mechelli, A., Green, D. W., & Price, C. J. (2010). The impact of second language learning on  
822 semantic and nonsemantic first language reading. *Cerebral Cortex*, *20*(2), 315–327.
- 823 Ostwald, D., Lam, J. M., Li, S., & Kourtzi, Z. (2008). Neural coding of global form in the human visual  
824 cortex. *Journal of Neurophysiology*, *99*(5), 2456–2469.
- 825 Parra, L. C., Spence, C. D., Gerson, A. D., & Sajda, P. (2005). Recipes for the linear analysis of EEG.  
826 *NeuroImage*, *28*(2), 326–341. doi: 10.1016/j.neuroimage.2005.05.032
- 827 Pearson, K. (1896). Vii. mathematical contributions to the theory of evolution.—iii. regression, heredity,  
828 and panmixia. *Philosophical Transactions of the Royal Society of London. Series A, containing papers of*  
829 *a mathematical or physical character*(187), 253–318.
- 830 Pleisch, G., Karipidis, I. I., Brem, A., Röthlisberger, M., Roth, A., Brandeis, D., ... Brem, S. (2019).  
831 Simultaneous eeg and fmri reveals stronger sensitivity to orthographic strings in the left occipito-temporal  
832 cortex of typical versus poor beginning readers [Journal Article]. *Developmental Cognitive Neuroscience*,  
833 100717.
- 834 Price, C. J., & Devlin, J. T. (2011). The interactive account of ventral occipitotemporal contributions to  
835 reading. *Trends in cognitive sciences*, *15*(6), 246–253.
- 836 Proverbio, A., & Adorni, R. (2009). C1 and p1 visual responses to words are enhanced by attention to  
837 orthographic vs. lexical properties. *Neuroscience letters*, *463*(3), 228–233.
- 838 Raij, T., Uutela, K., & Hari, R. (2000). Audiovisual integration of letters in the human brain. *Neuron*,  
839 *28*(2), 617–625.
- 840 Rauschecker, A. M., Bowen, R. F., Parvizi, J., & Wandell, B. A. (2012). Position sensitivity in the visual  
841 word form area. *Proceedings of the National Academy of Sciences*, *109*(24), E1568–E1577. Retrieved from  
842 <https://www.pnas.org/content/109/24/E1568> doi: 10.1073/pnas.1121304109
- 843 Rayner, K. (1998). Eye movements in reading and information processing: 20 years of research. *Psychological*  
844 *bulletin*, *124*(3), 372.
- 845 Rossion, B., Joyce, C. A., Cottrell, G. W., & Tarr, M. J. (2003). Early lateralization and orientation tuning  
846 for face, word, and object processing in the visual cortex. *Neuroimage*, *20*(3), 1609–1624.
- 847 Rossion, B., Prieto, E. A., Boremanse, A., Kuefner, D., & Van Belle, G. (2012). A steady-state visual  
848 evoked potential approach to individual face perception: effect of inversion, contrast-reversal and temporal  
849 dynamics. *NeuroImage*, *63*(3), 1585–1600.
- 850 Schurz, M., Kronbichler, M., Crone, J., Richlan, F., Klackl, J., & Wimmer, H. (2014). Top-down and  
851 bottom-up influences on the left ventral occipito-temporal cortex during visual word recognition: An  
852 analysis of effective connectivity. *Human brain mapping*, *35*(4), 1668–1680.
- 853 Seghier, M. L., & Price, C. J. (2013). Dissociating frontal regions that co-lateralize with different ventral  
854 occipitotemporal regions during word processing. *Brain and Language*, *126*(2), 133–140.
- 855 Sliwinska, M. W. W., Khadilkar, M., Campbell-Ratcliffe, J., Quevenco, F., & Devlin, J. T. (2012). Early  
856 and sustained supramarginal gyrus contributions to phonological processing. *Frontiers in Psychology*, *3*,  
857 161.
- 858 Stevens, W. D., Kravitz, D. J., Peng, C. S., Tessler, M. H., & Martin, A. (2017). Privileged functional  
859 connectivity between the visual word form area and the language system. *Journal of Neuroscience*,  
860 *37*(21), 5288–5297.

- 861 Stigliani, A., Weiner, K. S., & Grill-Spector, K. (2015). Temporal processing capacity in high-level visual  
862 cortex is domain specific. *Journal of Neuroscience*, *35*(36), 12412–12424.
- 863 Stothart, G., Quadflieg, S., & Milton, A. (2017). A fast and implicit measure of semantic categorisation  
864 using steady state visual evoked potentials. *Neuropsychologia*, *102*, 11–18.
- 865 Szwed, M., Dehaene, S., Kleinschmidt, A., Eger, E., Valabrègue, R., Amadon, A., & Cohen, L. (2011).  
866 Specialization for written words over objects in the visual cortex. *Neuroimage*, *56*(1), 330–344.
- 867 Szwed, M., Qiao, E., Jobert, A., Dehaene, S., & Cohen, L. (2014). Effects of literacy in early visual and  
868 occipitotemporal areas of chinese and french readers. *Journal of Cognitive Neuroscience*, *26*(3), 459–475.
- 869 Tang, Y., & Norcia, A. M. (1995). An adaptive filter for steady-state evoked responses. *Electroen-*  
870 *cephalography and Clinical Neurophysiology/Evoked Potentials Section*, *96*(3), 268–277. Retrieved from  
871 <https://www.sciencedirect.com/science/article/pii/0168559794003093> doi: [https://doi.org/](https://doi.org/10.1016/0168-5597(94)00309-3)  
872 [10.1016/0168-5597\(94\)00309-3](https://doi.org/10.1016/0168-5597(94)00309-3)
- 873 Tucker, D. M. (1993). Spatial sampling of head electrical fields: The geodesic sensor net. *Electroencephalogra-*  
874 *phy and Clinical Neurophysiology*, *87*(3), 154–163. doi: [http://dx.doi.org/10.1016/0013-4694\(93\)90121-B](http://dx.doi.org/10.1016/0013-4694(93)90121-B)
- 875 Turkeltaub, P. E., Gareau, L., Flowers, D. L., Zeffiro, T. A., & Eden, G. F. (2003). Development of neural  
876 mechanisms for reading. *Nature neuroscience*, *6*(7), 767–773.
- 877 Van Atteveldt, N., Formisano, E., Goebel, R., & Blomert, L. (2004). Integration of letters and speech sounds  
878 in the human brain [Journal Article]. *Neuron*, *43*(2), 271–282.
- 879 Vandermosten, M., Hoeft, F., & Norton, E. S. (2016). Integrating mri brain imaging studies of pre-reading  
880 children with current theories of developmental dyslexia: a review and quantitative meta-analysis. *Current*  
881 *opinion in behavioral sciences*, *10*, 155–161.
- 882 van de Walle de Ghelcke, A., Rossion, B., Schiltz, C., & Lochy, A. (2020). Developmental changes in neural  
883 letter-selectivity: A 1-year follow-up of beginning readers. *Developmental science*, e12999.
- 884 Van Rinsveld, A., Guillaume, M., Kohler, P. J., Schiltz, C., Gevers, W., & Content, A. (2020). The neural  
885 signature of numerosity by separating numerical and continuous magnitude extraction in visual cortex  
886 with frequency-tagged eeg. *Proceedings of the National Academy of Sciences*, *117*(11), 5726–5732.
- 887 Victor, J. D., & Mast, J. (1991). A new statistic for steady-state evoked potentials. *Electroencephalogra-*  
888 *phy and Clinical Neurophysiology*, *78*(5), 378 - 388. Retrieved from [http://www.sciencedirect.com/](http://www.sciencedirect.com/science/article/pii/001346949190099P)  
889 [science/article/pii/001346949190099P](http://www.sciencedirect.com/science/article/pii/001346949190099P) doi: [https://doi.org/10.1016/0013-4694\(91\)90099-P](https://doi.org/10.1016/0013-4694(91)90099-P)
- 890 Vidal, C., & Chetail, F. (2017). Bacs: The brussels artificial character sets for studies in cognitive psychology  
891 and neuroscience. *Behavior Research Methods*, *49*(6), 2093–2112.
- 892 Vinckier, F., Dehaene, S., Jobert, A., Dubus, J. P., Sigman, M., & Cohen, L. (2007). Hierarchical coding  
893 of letter strings in the ventral stream: dissecting the inner organization of the visual word-form system.  
894 *Neuron*, *55*(1), 143–156.
- 895 Woodhead, Z., Barnes, G., Penny, W., Moran, R., Teki, S., Price, C., & Leff, A. (2014). Reading front to  
896 back: Meg evidence for early feedback effects during word recognition. *Cerebral Cortex*, *24*(3), 817–825.
- 897 Woolnough, O., Rollo, P. S., Forseth, K. J., Kadipasaoglu, C. M., Ekstrom, A. D., & Tandon, N. (2020).  
898 Category selectivity for face and scene recognition in human medial parietal cortex. *Current Biology*.
- 899 Wydell, T. N., Vuorinen, T., Helenius, P., & Salmelin, R. (2003). Neural correlates of letter-string length and  
900 lexicality during reading in a regular orthography. *Journal of Cognitive Neuroscience*, *15*(7), 1052–1062.

- 901 Yeatman, J. D., & Norcia, A. M. (2016). Temporal tuning of word-and face-selective cortex. *Journal of*  
902 *cognitive neuroscience*, *28*(11), 1820–1827.
- 903 Yeatman, J. D., Rauschecker, A. M., & Wandell, B. A. (2013). Anatomy of the visual word form area:  
904 adjacent cortical circuits and long-range white matter connections. *Brain and language*, *125*(2), 146–  
905 155.
- 906 Zhao, J., Maurer, U., He, S., & Weng, X. (2019). Development of neural specialization for print: Evidence  
907 for predictive coding in visual word recognition [Journal Article]. *PLoS biology*, *17*(10).
- 908 Ziegler, J. C., Stone, G. O., & Jacobs, A. M. (1997). What is the pronunciation for-ough and the spelling  
909 for/u/? a database for computing feedforward and feedback consistency in english. *Behavior Research*  
910 *Methods, Instruments, & Computers*, *29*(4), 600–618.
